# Supplementary material for: Non-specific immunological effects of selected routine childhood immunisations: systematic review
Source: PubMed Central journal article supplement — BMJ. 2016 Oct 13;355:i5225. doi: 10.1136/bmj.i5225 (PMC5063033; doi:10.1136/bmj.i5225), 2016-10-13
Supplement: kanr027955.ww1_default.pdf [file kanr027955.ww1_default.pdf]

## Appendix 1: Search terms [posted as supplied by author]

### Embase search

Activins OR 'cytokine'/exp OR activin OR 'adipocytokines' OR 'adipokine' OR 'adipokines' OR 'adipose tissue derived cytokine' OR 'Acpr 30' OR 'Acpr30' OR 'adipocyte complement related protein 30' OR 'adipocyte most abundant protein 1' OR 'adipoq' OR 'APM 1' OR 'APM1' OR 'GBP 28' OR 'GBP28' OR 'gelatin binding protein 28' OR 'AIF 1' OR 'AIF1' OR 'cytokine AIF 1' OR 'cytokine AIF1' OR 'daintain' OR 'a proliferation inducing ligand' OR 'a proliferation inducing ligand protein' OR 'antigen CD256' OR 'CD256 antigen' OR 'protein APRIL' OR 'protein TALL2' OR 'protein TNFSF 13' OR 'protein TNFSF13' OR 'TALL 2 protein' OR 'TALL2 protein' OR 'TNF and ApoL related leukocyte expressed ligand 2' OR 'TNF related death ligand 1' OR 'TNFSF 13 protein' OR 'TNFSF13 protein' OR 'tumor necrosis factor and apolipoprotein related leukocyte expressed ligand 2' OR 'tumor necrosis factor ligand superfamily member 13' OR 'tumor necrosis factor related death ligand 1' OR 'tumor necrosis factor SF13' OR 'tumor necrosis factor superfamily member 13' OR 'B lymphocyte activating factor [134-285]' OR 'B lymphocyte stimulator [134-285]' OR 'ATX protein' OR 'ectonucleotide pyrophosphatase phosphodiesterase 2' OR 'ENPP2 protein' OR 'PDNP2 protein' OR 'protein ATX' OR 'protein ENPP2' OR 'protein PDNP2' OR 'antigen CD257' OR 'B-cell activating factor' OR 'B cell activation factor' OR 'B lymphocyte activating factor' OR 'B lymphocyte stimulator' OR 'B lymphocyte stimulator protein' OR 'BAFF' OR 'BLyS protein' OR 'CD257 antigen' OR 'protein BLyS' OR 'protein TALL 1' OR 'protein TALL1' OR 'protein TNFSF13B' OR 'TALL 1 protein' OR 'TALL1 protein' OR 'TNF and ApoL related leukocyte expressed ligand 1' OR 'TNFSF13B protein' OR 'tumor necrosis factor and apolipoprotein related leukocyte expressed ligand 1' OR 'tumor necrosis factor ligand superfamily member 13B' OR 'B cell differentiation factor' OR 'bcdf' OR 'B cell growth factor' OR 'bcgf' OR 'growth factor, b cell' OR 'bone morphogenetic proteins' OR 'bone morphogenic protein' OR 'BMP 12' OR 'BMP12' OR 'cartilage derived morphogenetic protein 3' OR 'CDMP 3' OR 'CDMP3' OR 'GDF 7' OR 'GDF7' OR 'growth and differentiation factor 7' OR 'growth differentiation factor 7' OR 'BMP 15' OR 'BMP15' OR 'GDF 9B' OR 'GDF9B' OR 'growth and differentiation factor 9B' OR 'growth differentiation factor 9B' OR 'BMP 2' OR 'BMP2' OR 'BMP 4' OR 'BMP4' OR 'BMP 5' OR 'BMP5' OR 'BMP 6' OR 'BMP6' OR 'BMP 9' OR 'BMP9' OR 'GDF 2' OR 'GDF2' OR 'growth and differentiation factor 2' OR 'growth differentiation factor 2' OR '4-1BB ligand' OR '4 1BB ligand' OR '4 1BBL protein' OR 'CD137L' OR 'ligand 4 1BB' OR 'protein 4 1BBL' OR 'antigen CD153' OR 'CD153 antigen' OR 'CD153 antigens' OR 'CD30L' OR 'protein TNFSF 8' OR 'protein TNFSF8' OR 'TNFSF 8 protein' OR 'TNFSF8 protein' OR 'tumor necrosis factor ligand superfamily member 8' OR 'tumor necrosis factor superfamily member 8' OR 'antigen CD154' OR 'CD154 antigen' OR 'CD40L' OR 'CD40L antigen' OR 'protein TNFSF 5' OR 'protein TNFSF5' OR 'TNFSF 5 protein' OR 'TNFSF5 protein' OR 'tumor necrosis factor ligand superfamily member 5' OR 'tumor necrosis factor superfamily member 5' OR 'antigen cd70' OR 'antigens, CD70' OR 'CD27 ligand' OR 'CD27L' OR 'CD70 antigens' OR 'colony-stimulating factors' OR 'colony stimulating activity' OR 'colony stimulating factors' OR 'fibroblast derived differentiation inducing factor' OR 'ectodermal dysplasia protein' OR 'ectodysplasin 1' OR 'ectodysplasins' OR 'EDA A protein' OR 'EDA protein' OR 'protein EDA' OR 'protein EDA A' OR 'am 424' OR 'am424' OR 'recombinant human leukemia inhibitory factor' OR 'recombinant leukemia inhibitory factor' OR 'EMAP II' OR 'endothelial monocyte activating polypeptide 2' OR 'antigen CD178' OR 'CD178 antigen' OR 'CD95 ligand' OR 'CD95L' OR 'CD95L protein' OR 'Fas antigen ligand' OR 'Fas ligand protein' OR 'FasL protein' OR 'protein CD95L' OR 'protein FasL' OR 'protein TNFSF 6' OR 'protein TNFSF6' OR 'TNF superfamily member 6' OR 'TNFSF 6 protein' OR 'TNFSF6 protein' OR 'tumor necrosis factor ligand superfamily member 6' OR 'fibroblast growth factors' OR 'fibroblast stimulating factor' OR 'heparin binding growth factor' OR 'fgf 1' OR 'FGF1' OR 'fgf 10' OR 'FGF10' OR 'fgf 14' OR 'FGF14' OR 'fgf 16' OR 'FGF16' OR 'fgf 18' OR 'FGF18' OR 'fgf 19' OR 'FGF19' OR 'fgf2' OR 'FGF 2' OR 'fgf21' OR 'FGF 21' OR 'fgf23' OR 'FGF 23' OR 'fgf3' OR 'FGF 3' OR 'fgf4' OR 'FGF 4' OR 'fgf5' OR 'FGF 5' OR 'fgf6' OR 'FGF 6' OR 'fgf8' OR 'FGF 8' OR 'fgf9' OR 'FGF 9' OR 'interleukin' OR 'interleukins' OR 'il 1' OR 'il 2' OR 'il 4' OR 'il 5' OR 'il 6' OR 'il 9' OR 'il 10' OR 'il 12' OR 'il 13' OR 'il 17' OR 'il 23' OR 'interferon' OR 'helper cell type 1' OR 'T helper 1' OR 'T helper type 1' OR 'Th1 cells' OR 'helper cell type 2' OR 'T helper 2' OR 'T helper type 2' OR 'Th2 cells' OR 'helper cell/exp OR 't helper' OR 'B lymphocyte/exp OR 'B-lymphocyte subsets' OR 'B-lymphocytes' OR 'b-lymphocytes, regulatory' OR 'B cell' OR 'bone marrow derived lymphocyte' OR 'bone marrow lymphocyte' OR 'bursa derived lymphocyte' OR 'lymphocyte, b' OR 'lymphocyte, bone marrow derived' OR 'lymphocyte, bursa derived' OR 'regulatory B lymphocyte' OR 'antibody-producing cells' OR 'antibody forming cell' OR 'antibody producing cell' OR 'immunoglobulin forming cell' OR 'B memory cell' OR 'B memory cells' OR 'B memory lymphocyte' OR 'B memory lymphocytes' OR 'memory B cell' OR 'memory B cells' OR 'memory B lymphocyte' OR 'memory B lymphocytes' OR 'cell, plasma' OR 'flamed plasma cell' OR 'flamed plasmacell' OR 'plasma cells' OR 'plasmacyte' OR 'plasmatocyte' OR 'plasmocyte' OR 'plasmocyte, flamed' OR 'B cell precursor' OR 'B cell precursors' OR 'B cell progenitor' OR 'B cell progenitors' OR 'B lineage precursor' OR 'B lineage

precursors' OR ' B lineage progenitor' OR ' B lineage progenitors' OR ' B lymphocyte precursor' OR ' B lymphocyte progenitor' OR ' B lymphocyte progenitors' OR ' B lymphoid precursor cell' OR ' B lymphoid precursor cells' OR ' B lymphoid progenitor' OR ' B lymphoid progenitors' OR ' B precursor' OR ' B precursors' OR ' B progenitor' OR ' B progenitors' OR ' cell, pre B' OR ' immature B cell' OR ' immature B cells' OR ' pre B cell' OR ' pre B cells' OR ' precursor B cell' OR ' precursor B cells' OR ' precursor B lymphocyte' OR ' precursor B lymphocytes' OR ' precursor cells, B-lymphoid' OR ' precursor cells, B lymphoid' OR ' pro-B cell' OR ' pro-B cells' OR ' progenitor B cell' OR ' progenitor B cells' OR ' transitional B cell' OR ' transitional B cells' OR " tumor necrosis factor receptor 1"/exp OR " tumor necrosis factor receptor 1 " OR " CD120a antigen" OR " receptors, tumor necrosis factor, type I" OR " tumor necrosis factor receptor type 1" OR " tumor necrosis factor receptor type I" OR 'dendritic cell'/exp OR 'dendritic cells' OR 'dendritic cell' OR 'langerhans cell' OR 'langerhans cells' OR 'T lymphocyte'/exp OR 'amplifier t lymphocyte' OR ' lymphocyte, thymus' OR ' T-lymphocytes' OR ' t-lymphocytes, suppressor-inducer' OR ' T cell' OR ' T cells' OR ' thymic lymphocyte' OR ' thymus dependant lymphocyte' OR ' thymus dependent cell' OR ' thymus dependent lymphocyte' OR ' thymus derived cell' OR ' thymus derived lymphocyte' OR ' thymus lymphocyte' This in combination with - Any Bacillus Calmette Guerin containing vaccine - Any Diphtheria toxoid containing vaccine - Any Tetanus toxoid containing vaccine - Any *Bordetella pertussis* containing vaccine - Any measles containing vaccine

#### **PubMed search**

((("T-Lymphocytes, Helper-Inducer"[Mesh]) OR "T-Lymphocytes, Regulatory"[Mesh]) OR "Cytokines"[Mesh]) OR "Antigen-Presenting Cells"[Mesh]) AND (((("BCG Vaccine"[Mesh]) OR "Measles Vaccine"[Mesh]) OR "DTP Vaccine"[Mesh])

#### **Cochrane search**

((("T-Lymphocytes, Helper-Inducer"[Mesh]) OR "T-Lymphocytes, Regulatory"[Mesh]) OR "Cytokines"[Mesh]) OR "Antigen-Presenting Cells"[Mesh]) AND (((("BCG Vaccine"[Mesh]) OR "Measles Vaccine"[Mesh]) OR "DTP Vaccine"[Mesh])

From this search only trials are going to be included.

#### **Trip search**

BCG vaccine OR Measles vaccine OR DTP vaccine
