# Supplementary material for: Non-specific immunological effects of selected routine childhood immunisations: systematic review
Source: PubMed Central journal article supplement — BMJ. 2016 Oct 13;355:i5225. doi: 10.1136/bmj.i5225 (PMC5063033; doi:10.1136/bmj.i5225), 2016-10-13
Supplement: kanr027955.ww2_default.pdf [file kanr027955.ww2_default.pdf]

## Appendix 2: Supplementary tables [posted as supplied by author]

**Table A. Characteristics of included BCG vaccine studies**

| Author                         | Methods                                                                                                                | Participants                                                                                                                               | Interventions                                                                    | Outcomes                                                                                        | Non-specific outcomes                                                                                                                  | Method of reporting non-specific outcomes                           | Difference in NSE outcome                                     | Notes                                                                                                                                                                  |
|--------------------------------|------------------------------------------------------------------------------------------------------------------------|--------------------------------------------------------------------------------------------------------------------------------------------|----------------------------------------------------------------------------------|-------------------------------------------------------------------------------------------------|----------------------------------------------------------------------------------------------------------------------------------------|---------------------------------------------------------------------|---------------------------------------------------------------|------------------------------------------------------------------------------------------------------------------------------------------------------------------------|
| Akkoc <i>et al</i> 2010[1]     | Open, randomized, single centre trial                                                                                  | Healthy term newborns (n=19)                                                                                                               | BCG vaccination at birth (n=10) compared to BCG vaccination at 2 months (n=9)    | Cytokine responses                                                                              | IFN- $\gamma$ and IL-10 responses to PBMCs stimulated with PHA                                                                         | pg/ml                                                               | Non-significant(NS) between groups.                           |                                                                                                                                                                        |
| Andersen <i>et al</i> 2013[2]  | Randomised, control trial, Samples at 6-11 weeks (early sample group, n=124) or 5-9 months (late sample group, n=221). | Infants in Guinea-Bissau, n=357 (345 included in analysis)                                                                                 | BCG revaccination at 19 months, n=158 or nothing, n=187                          | IFN- $\gamma$ , IL-13, TNF- $\alpha$ and IL-10 stimulated with LPS, PPD, or PHA.                | IFN- $\gamma$ , IL-13, TNF- $\alpha$ and IL-10 stimulated with LPS or PHA.                                                             | Geometric mean/geometric mean ratio                                 | NS for IFN- $\gamma$ and IL-13                                | Part of the REVAC trial which was halted prematurely due to excess mortality.                                                                                          |
| Black <i>et al</i> 2001[3]     | Randomised, controlled trial, single region                                                                            | Healthy individuals from Northern Malawi with no prior history of BCG vaccination                                                          | BCG compared to placebo (dextran matrix of BCG vaccine), single dose.            | Skin tests and IFN- $\gamma$ responses to Mycobacterial spp.                                    | IFN- $\gamma$ responses to control samples in lymphocyte cultures                                                                      | pg/ml                                                               | NS                                                            | Study carried out in the context of the Karonga Prevention Study, a large vaccine trial and epidemiological study of tuberculosis and leprosy in the Karonga district. |
| Black <i>et al</i> 2002[4]     | Randomised, controlled trial, multiple regions                                                                         | Healthy young adults from Northern Malawi (n= 633, mean age 19 years) and East London and Essex, United Kingdom (n=424, mean age 14 years) | BCG vaccination compared to placebo                                              | IFN- $\gamma$ responses to control antigens and PPD, and skin testing to mycobacterial antigens | IFN- $\gamma$ responses to control antigens                                                                                            | pg/ml                                                               | NS                                                            | Study carried out in the context of the Karonga Prevention Study, a large vaccine trial and epidemiological study of tuberculosis and leprosy in the Karonga district. |
| Burl <i>et al</i> Jul. 2010[5] | Open, randomised, single centre trial                                                                                  | Healthy Gambian newborns (n=103)                                                                                                           | BCG vaccination at birth (n=53) compared to BCG vaccination at 4.5 months (n=50) | Cytokine responses and cell phenotyping                                                         | Whole blood phenotyping<br><br>IFN- $\gamma$ , IL-13, IL-6, IL-17 and IL-10 production by whole blood stimulated with control antigens | % CD4+CD25+ T cells and % CD4+CD25+FOXP3+ T cells<br><br>Log10pg/ml | NS                                                            |                                                                                                                                                                        |
| Burl <i>et al</i> Aug. 2010[6] | Open, randomised, single centre trial                                                                                  | Healthy Gambian newborns (n=103)                                                                                                           | BCG vaccination at birth compared to BCG vaccination at 4.5 months               | Immune responses to tuberculin skin tests, cytokine studies and cellular phenotyping            | Controls (SEB) used for whole blood IFN- $\gamma$ and IL-10 responses (not reported)<br><br>T cell phenotype                           | pg/ml<br><br>%CD4+CD25+ T cells and %CD4+CD25+FOXP3+ T cells        | Non-specific data not reported therefore significance unknown |                                                                                                                                                                        |
| Burl <i>et al</i> 2009         | Open, randomised,                                                                                                      | Healthy Gambian                                                                                                                            | BCG vaccination at birth                                                         | Cytokine studies and                                                                            | Cytokines (IL10, IL-13                                                                                                                 | pg/ml                                                               | Increased IL-10                                               | NB PhD thesis from                                                                                                                                                     |

|                                          |                                                                                                                                    |                                                                                       |                                                                                                                                              |                                                                       |                                                                                                                                   |                                                 |                                                                                                                                                                                                                                                                                                                             |                                                  |
|------------------------------------------|------------------------------------------------------------------------------------------------------------------------------------|---------------------------------------------------------------------------------------|----------------------------------------------------------------------------------------------------------------------------------------------|-----------------------------------------------------------------------|-----------------------------------------------------------------------------------------------------------------------------------|-------------------------------------------------|-----------------------------------------------------------------------------------------------------------------------------------------------------------------------------------------------------------------------------------------------------------------------------------------------------------------------------|--------------------------------------------------|
| [7]                                      | single centre trial                                                                                                                | newborns (n=103)                                                                      | compared to BCG vaccination at 4.5 months                                                                                                    | cellular phenotyping                                                  | and IFN- $\gamma$ from whole blood cultures stimulated with SEB.<br><br>Cellular phenotyping                                      | %CD4+CD25+ T cells and %CD4+CD25+FOX 3+ T cells | production at 4.5 months in SEB stimulated cultures of vaccinated compared to unvaccinated (p<0.0421).                                                                                                                                                                                                                      | which two other included publications were based |
| Djuardi <i>et al</i> 2010[8]             | Birth cohort from two regions in Indonesia                                                                                         | Newborns (n=147, mean age at vaccination 5 weeks, IQR 2-8.5)                          | Infant vaccination program comprising, BCG, Hepatitis B, DTP, OPV and measles vaccines.                                                      | Cytokine responses                                                    | IFN- $\gamma$ , IL-5, TNF- $\alpha$ , IL-10 and IL-13 responses from whole blood cultures stimulated with PHA, LPS and media only | pg/ml and median with IQR                       | Increased IFN- $\gamma$ production to PHA at 24 months vs baseline (p<0.001). Decreased IL-5 to PHA at 5 months vs baseline (p<0.05). Decreased TNF- $\alpha$ and IL-10 to LPS at 24 months vs baseline (p<0.001)                                                                                                           |                                                  |
| Elliot <i>et al</i> 2011[9] (BCG and TT) | Observational analysis of newborns after a randomised, double blinded, controlled trial of anti-helminth therapy in pregnant women | Newborns of women recruited from a Ugandan hospital antenatal clinic (n=2345).        | Infant vaccination program comprising of BCG, polio, diphtheria, pertussis, tetanus, hepatitis B, <i>H. influenzae</i> and measles vaccines. | Cytokine responses to BCG and TT                                      | IFN- $\gamma$ , IL-5, IL-13 and IL-10 responses to control stimulated cultures (not reported)                                     | Geometric mean ratios                           | Not specific results/significance not reported                                                                                                                                                                                                                                                                              |                                                  |
| Faustman <i>et al</i> 2012[10]           | Double blinded, randomised, controlled, single centre, trial                                                                       | Long term type 1 diabetic adults (n=6) and healthy non-diabetic controls              | BCG vaccination (n=3 diabetics and n=3 controls) compared to placebo (n= 3 diabetics and n=3 controls)                                       | T-cells, auto-antibodies and C-peptide                                | Autoreactive T cells<br><br>Insulin autoantibodies (GAD, IA-2A, ZnT8A)<br><br>C-peptide                                           | %<br><br>Units<br><br>pmol/L                    | Autoreactive T cells -Significance tests not reported<br><br>Insulin autoantibodies-GAD:2 BCG treated subjects significant changes from baseline (one increase, one decrease p=0.0001/0.0017). ZnT8A: significant decrease in one BCG subject only<br><br>Transient and significant rise in C-peptide level in BCG subjects |                                                  |
| Fjallbrant <i>et al</i> 2007[11]         | Cohort study, all subjects immunised and blood taken before and 2 months and 1 year after vaccination.                             | TST negative, healthy students in Sweden either never vaccinated (n=15) or previously | BCG vaccine                                                                                                                                  | Lymphocyte transformation stimulated with PPD, ConA and unstimulated. | Lymphocyte transformation stimulated with ConA and unstimulated.                                                                  | CPM                                             | Non-specific data not reported                                                                                                                                                                                                                                                                                              |                                                  |

|                              |                                                                                                                       |                                                                                                                  |                                                                                                                                                                         |                                                                                                                                                                                              |                                                                                                                                                                                                                          |                                                                                                                                      |                                                                                                                                                        |  |
|------------------------------|-----------------------------------------------------------------------------------------------------------------------|------------------------------------------------------------------------------------------------------------------|-------------------------------------------------------------------------------------------------------------------------------------------------------------------------|----------------------------------------------------------------------------------------------------------------------------------------------------------------------------------------------|--------------------------------------------------------------------------------------------------------------------------------------------------------------------------------------------------------------------------|--------------------------------------------------------------------------------------------------------------------------------------|--------------------------------------------------------------------------------------------------------------------------------------------------------|--|
|                              |                                                                                                                       | vaccinated (n=16), total n=31.                                                                                   |                                                                                                                                                                         | Cytokine levels from supernatants, stimulated as above                                                                                                                                       | Unstimulated and ConA stimulated cytokine levels                                                                                                                                                                         |                                                                                                                                      |                                                                                                                                                        |  |
| Gruber <i>et al</i> 2000[12] | Prospective cohort of vaccinated and unvaccinated children. Samples taken at birth, 12, 24, 36, 60, 72 and 84 months. | Part of a neonatal birth cohort in Germany, (MAS-90 study group), total n=1314. Included in this analysis, n=774 | Children at high risk for TB were vaccinated with BCG, median age 30 days (range 1-343) n=169. Included in this analysis, n=92.                                         | Atopic manifestations<br><br>Total and specific IgE                                                                                                                                          | Atopic manifestations<br><br>Total and specific IgE                                                                                                                                                                      | % with specified symptoms<br><br>kU/L                                                                                                | NS<br><br>NS<br>(NB percentage of positive IgE tests from total tests performed was lower in BCG groups in first 3 years then higher at 5 and 7 years) |  |
| Hoft <i>et al</i> 1998[13]   | Double-blinded, randomized controlled study                                                                           | Healthy adults (n=54, age 18-45 years)                                                                           | Connaught BCG (n=18), Tice BCG (n=18), placebo (n=18)                                                                                                                   | T cell proliferation to mycobacterial antigens and controls, T cell subset expansion proliferation to mycobacterial antigens and controls, T cell subsets following IL-2 and IPP stimulation | T cell proliferation responses to media and tetanus toxoid<br><br>T cell subset expansion to media and tetanus toxoid<br><br>T cell subsets following IL-2 and IPP stimulation                                           | fold increase dpm of day 56 compared to day 0<br><br>mean % of cells<br><br>Absolute number of CD4+, CD8+ and $\gamma\delta$ T cells | NS<br><br>NS<br><br>Increased CD4 (p<0.01), CD8 (p=0.02) and $\gamma\delta$ (p=0.03) T cell proliferation following IL-2 plus IPP in BCG responders.   |  |
| Hoft <i>et al</i> 1999[14]   | Double-blinded, randomized controlled study and an open label study                                                   | Healthy adults (n=66, age 18-45 years)                                                                           | Connaught BCG (n=12, open label, n=18 double blind), Tice BCG (n=18 double blind), placebo (n=18 double-blind)                                                          | T cell proliferation, IFN- $\gamma$ and IL-4 production, cytotoxicity assays, and mycobacterial antibodies                                                                                   | T cell proliferation to PHA and media alone<br><br>IFN- $\gamma$ and IL-4 ELISpot responses from PBMCs incubated with media alone<br><br>IFN- $\gamma$ and IL-4 ELISAs of culture supernatants of PBMCs with media alone | dpm<br><br>spot forming cells/1 <sup>4</sup> cells<br><br>pg/ml                                                                      | Non-specific data not reported                                                                                                                         |  |
| Hussey <i>et al</i> 2002[15] | Five groups with different vaccine timing and methodologies                                                           | Healthy newborns recruited from primary care services                                                            | Danish BCG at birth intradermally n=11, Danish BCG at 10 weeks intradermally n=11, Japanese BCG at birth intradermally n=10, Japanese BCG at birth percutaneously using | PBMC proliferation, cytokine responses and cytotoxicity                                                                                                                                      | PHA and TT proliferation responses<br><br>TT IFN- $\gamma$ , IL-10 and IL-5 responses                                                                                                                                    | pg/ml<br><br>pg/ml                                                                                                                   | NS<br><br>NS                                                                                                                                           |  |

|                                      |                                                                                                                  |                                                                                                      |                                                                                           |                                                                                                                                                              |                                                                                                                                                                                                                                                        |                                                                   |                                                                                                                                                                                                                                                                  |                                                         |
|--------------------------------------|------------------------------------------------------------------------------------------------------------------|------------------------------------------------------------------------------------------------------|-------------------------------------------------------------------------------------------|--------------------------------------------------------------------------------------------------------------------------------------------------------------|--------------------------------------------------------------------------------------------------------------------------------------------------------------------------------------------------------------------------------------------------------|-------------------------------------------------------------------|------------------------------------------------------------------------------------------------------------------------------------------------------------------------------------------------------------------------------------------------------------------|---------------------------------------------------------|
|                                      |                                                                                                                  |                                                                                                      | Bignell tool n=10, Japanese BCG at birth percutaneously using Biovac tool n=20.           |                                                                                                                                                              |                                                                                                                                                                                                                                                        |                                                                   |                                                                                                                                                                                                                                                                  |                                                         |
| Kagina <i>et al</i> 2009[16]         | Single centre, randomized study                                                                                  | Healthy newborns (n=46)                                                                              | BCG vaccination at birth (n=25) or delayed until 10 weeks of age (n=21)                   | Whole blood intracellular cytokines (IFN- $\gamma$ , TNF- $\alpha$ and IL-2), and Lymphocyte phenotyping of BCG specific cells                               | Whole blood intracellular cytokines (IFN- $\gamma$ , TNF- $\alpha$ and IL-2)                                                                                                                                                                           | % of cytokine positive CD4+ T cells                               | NS (in supplementary data)                                                                                                                                                                                                                                       |                                                         |
| Kleinnijenhuis <i>et al</i> 2012[17] | Open label cohort study                                                                                          | Healthy adults aged 20-36 years scheduled to receive BCG due to travel to TB endemic regions (n=20). | BCG vaccination                                                                           | Cytokines in response to TB, <i>S. aureus</i> and <i>C. albicans</i> and phenotype of circulating monocytes.                                                 | IFN- $\gamma$ , TNF- $\alpha$ and IL-1 $\beta$ production from PBMC cultures stimulated with <i>S. aureus</i> and <i>C. albicans</i><br><br>CD14+ cells<br><br>TLR4 and CD11b surface expression<br><br>IL-1 $\beta$ and TNF- $\alpha$ mRNA expression | fold induction<br><br>% of total<br><br>MFI<br><br>Fold induction | Sig increase from baseline at 2w and 3m (except <i>S. aureus</i> and IL-1 $\beta$ at 2 weeks), p<0.05 or 0.01<br><br>Sig increase at 2 weeks (p<0.05)<br><br>TLR4: Sig decrease at 2 weeks (p<0.05) and increase at 3m (p<0.005)<br>CD11b sig increase<br><br>NS |                                                         |
| Lalor <i>et al</i> 2009[18]          | Combination of a case-control study in the UK and a cohort in Malawi                                             | Healthy infants from the UK (n=117) and Malawi (n=615)                                               | UK - BCG vaccination compared to unvaccinated age-match controls Malawi - BCG vaccination | IFN- $\gamma$ responses to PPD                                                                                                                               | IFN- $\gamma$ responses from whole blood cultures stimulated with control antigens                                                                                                                                                                     | pg/ml                                                             | Statistical comparisons not reported                                                                                                                                                                                                                             | Unpublished data included in analysis                   |
| Lalor <i>et al</i> 2010[19]          | Case-control study comparing vaccinated and unvaccinated infants 3 months after vaccination.                     | UK infants, n=28                                                                                     | Cases: BCG vaccination at 5-10 weeks (mean 7 weeks)<br>Controls: no BCG.                  | IFN- $\gamma$ production stimulated a by PHA, TB PPD or unstimulated.<br><br>21 cytokine and chemokines in supernatants stimulated by TB PPD or unstimulated | IFN- $\gamma$ production stimulated by PHA, or unstimulated.<br><br>21 cytokines and chemokines in unstimulated supernatants.                                                                                                                          | pg/ml                                                             | Unstimulated control data not reported.                                                                                                                                                                                                                          | Infants had previously taken part in an IFN gamma study |
| Lalor <i>et al</i> 2011[20]          | Sub-group of a larger study consisting of a combination of a case-control study in the UK and a cohort in Malawi | Healthy infants from the UK (n=28 vaccinated and n=9 unvaccinated) and from Malawi (n=40 vaccinated) | UK - BCG vaccination compared to unvaccinated age-match controls Malawi - BCG vaccination | Cytokine, chemokine and growth factor responses.                                                                                                             | Large panel of cytokine and chemokine responses (multiplex bead array) from whole blood cultures stimulated with control antigens                                                                                                                      | pg/ml                                                             | Control data not reported                                                                                                                                                                                                                                        |                                                         |
| Libraty <i>et al</i> 2014[21]        | Case-control study (nested into a dengue virus study)                                                            | Infants who had not received BCG in the first 2 weeks of life                                        | BCG in first two weeks or delayed until after first vaccination with                      | IFN- $\gamma$ ELISpot. Flow cytometry                                                                                                                        | IFN- $\gamma$ ELISpot to TT, Polio, HBsAg and PHA. T cell intracellular                                                                                                                                                                                | SFC/10 <sup>6</sup> cells % cells                                 | BCG vaccinated infants had increased IFN- $\gamma$                                                                                                                                                                                                               |                                                         |

|                                |                                                                                                                                                       |                                                                                                                                                                                                                                                                     |                                                                                                                                                                               |                                                                                                                                                                                                                |                                                                                                                         |                                                                                  |                                                                                                                  |                                                               |
|--------------------------------|-------------------------------------------------------------------------------------------------------------------------------------------------------|---------------------------------------------------------------------------------------------------------------------------------------------------------------------------------------------------------------------------------------------------------------------|-------------------------------------------------------------------------------------------------------------------------------------------------------------------------------|----------------------------------------------------------------------------------------------------------------------------------------------------------------------------------------------------------------|-------------------------------------------------------------------------------------------------------------------------|----------------------------------------------------------------------------------|------------------------------------------------------------------------------------------------------------------|---------------------------------------------------------------|
|                                |                                                                                                                                                       | (n=13) and age-and sex match infants who did receive BCG in the first two weeks (n=38)                                                                                                                                                                              | DTP                                                                                                                                                                           |                                                                                                                                                                                                                | cytokine staining for; IFN- $\gamma$ +/TNF- $\alpha$ /CD4+/CD4RO+/- FoxP3+TNF- $\alpha$ /CD4+/CD4RO+/-                  |                                                                                  | ELISpot to TT (p=0.046) and IFN- $\gamma$ +/TNF- $\alpha$ /CD4+/CD4RO + T cells (p=0.018)                        |                                                               |
| Lowry <i>et al</i> 1998[22]    | Randomised, placebo-controlled trial comparing different doses of BCG with saline. Blood samples before, 2 and 16 weeks and 1 year after vaccination. | Healthy adults aged 18-44 years born in the USA, not previously vaccinated with BCG, n=76                                                                                                                                                                           | Very low dose BCG, low dose BCG, standard dose BCG or high dose BCG or saline placebo.<br><br>5 subjects from very low, low and placebo groups were revaccinated at 18 weeks. | Adverse events.<br><br>PPD skin tests.<br><br>Lymphoproliferation to M TB, Ag85, BCG, <i>M. avium</i> and ConA.<br><br>IL-4 and IFN- $\gamma$ stimulated as above<br><br>IgG sero-reactivity to BCG-SA antigen | Lymphoproliferation to Con A<br><br>IL-4 and IFN- $\gamma$ to ConA (not reported)                                       | CPM<br><br>Not reported                                                          | NS (p value not reported)<br><br>Not reported                                                                    |                                                               |
| Marchant <i>et al</i> 1999[23] | Single centre, randomised, controlled trial                                                                                                           | Healthy newborns (n=137)                                                                                                                                                                                                                                            | BCG vaccination given at birth, 2 months or 4 months.                                                                                                                         | Whole blood and PBMC proliferation and cytokine responses                                                                                                                                                      | lymphoproliferation<br><br>IFN- $\gamma$ , IL-5, IL-13 and IL-4 responses following culture with PHA                    | Stimulation index<br><br>pg/ml                                                   | NS<br><br>NS                                                                                                     |                                                               |
| Marks <i>et al</i> 2003[24]    | Retrospective case-control study across two regions of Sydney, Australia                                                                              | Children from a region where BCG vaccination was routine (n=309, age 9.5+/-2.4 years) and another region where it was not (n=442, age 9.7+/-2.0).                                                                                                                   | BCG vaccination compared to unvaccinated                                                                                                                                      | Cytokine responses, Clinical components of allergy                                                                                                                                                             | IL-4, IL-5, IL-10 and IFN- $\gamma$ secreted in response to house dust mite stimulation of PBMCs<br><br>Serum total IgE | Stimulation index, median with bow and whisker plots<br><br>Geometric mean kIU/L | IL-10 SI significantly lower for BCG recipients, p<0.0001. NS for other cytokines<br><br>Comparison not reported |                                                               |
| Miles <i>et al</i> 2008[25]    | Cohort study, all infants vaccinated and part of a larger CMV cohort study.                                                                           | Male and female infants in the Gambia taking part in a CMV study, all infected with CMV, n=133 (though not all sampled at all time-points). Children aged 4-5 years in the Gambia, n=25 and adult females aged 21-31 years who had given birth 18 months ago, n=11. | Infants were immunised at birth with BCG. All children were recorded to have received BCG. Adults assumed to have had BCG.                                                    | IFN- $\gamma$ , IL-2, CD154 responses of CD4 T cells stimulated with PPD or normal human dermal fibroblast lysate (NHDF as required by CMV study)                                                              | IFN- $\gamma$ IL-2, CD154 responses of CD4 T cells stimulated NHDF (not reported).                                      | % of CD4 cells expressing the cytokine, median with interquartile range.         | Not reported                                                                                                     | Part of a larger CMV study and all infants had CMV infection. |
| Miles <i>et al</i> 2010[26]    | Single centre, case-control study examining maternal HIV status on newborns response to BCG                                                           | Newborns of HIV positive (n=16) and negative (n=21) Malawian women                                                                                                                                                                                                  | BCG vaccination at birth (OPV also given).                                                                                                                                    | IFN- $\gamma$ responses to BCG and PPD, cellular phenotypes. PHA controls.                                                                                                                                     | CD4 counts in HIV negative infants born to HIV negative mothers<br><br>CCR7 and CD45RA expression                       | Median with IQR<br><br>Cells/ml blood x 10 <sup>5</sup>                          | Significance reported between groups (based on HIV status of mother), all of whom were vaccinated.               |                                                               |

|                                         |                                                                                                                                                  |                                                                                                                                                                                |                                                                                                                                                                     |                                                                                       |                                                                                                                                                          |                                                                                          |                                                                                                                                                             |                                                                                          |
|-----------------------------------------|--------------------------------------------------------------------------------------------------------------------------------------------------|--------------------------------------------------------------------------------------------------------------------------------------------------------------------------------|---------------------------------------------------------------------------------------------------------------------------------------------------------------------|---------------------------------------------------------------------------------------|----------------------------------------------------------------------------------------------------------------------------------------------------------|------------------------------------------------------------------------------------------|-------------------------------------------------------------------------------------------------------------------------------------------------------------|------------------------------------------------------------------------------------------|
|                                         |                                                                                                                                                  |                                                                                                                                                                                |                                                                                                                                                                     |                                                                                       | CD27 and CD28 expression<br>PD-1+ and CD57+, CD4+ T cells<br>IFN- $\gamma$ release by PBMCs                                                              | Cells/ml blood x 10 <sup>5</sup><br>%<br>Spot forming units per 10 <sup>6</sup> PBMCs    |                                                                                                                                                             |                                                                                          |
| Ota <i>et al</i> 2002[27]               | Single centre, randomised trial                                                                                                                  | Healthy newborns (n=151)                                                                                                                                                       | BCG vaccination given at birth, 2 months or 4.5 months. Routine vaccine schedule (OPV, DTP and Hepatitis B vaccine) also given                                      | Proliferation, cytokine and vaccine specific antibody responses                       | PBMC proliferation to HBsAg, TT and PHA<br>IL-5, IL-13 and IFN- $\gamma$ PBMC responses to HBsAg, TT and PHA<br>Antibody responses to HBsAg, TT, PV1, DT | Stimulation index<br>pg/ml<br>mIU/ml                                                     | Significant between groups<br>Significant between groups<br>Significant between groups                                                                      |                                                                                          |
| Smith <i>et al</i> 2012[28]             | Two case-control studies: one in infants the other in adolescents                                                                                | UK born BCG vaccinated infants (n=21 mean age 11.5, SD 6.8 weeks) and unvaccinated (n=18, mean age 13, SD 3.4). Adolescents vaccinated with BCG (n=16) and unvaccinated (n=20) | BCG vaccinated compared to unvaccinated                                                                                                                             | Cytokine and chemokine responses to PPD and Heparin-binding haemagglutinin            | PHA used as positive control (reported in supplemental data).                                                                                            | Pg/ml<br>Median with interquartile range                                                 | NS                                                                                                                                                          |                                                                                          |
| Soares <i>et al</i> 2013a[29]           | Cohort study                                                                                                                                     | Healthy newborns (n=90)                                                                                                                                                        | BCG vaccination at birth                                                                                                                                            | Intracellular cytokine expression of T cells.                                         | PMA, TT, PHA stimulated cytokine responses                                                                                                               | Data not reported                                                                        | Not reported                                                                                                                                                |                                                                                          |
| Steenhuis <i>et al</i> 2008[30]         | Randomized, prospective, single blinded (researcher) trial to determine effect of BCG on allergic disease.                                       | Mainly Caucasian newborns with mother or father and sibling with allergic disease (n=121)                                                                                      | BCG vaccination or placebo (normal saline) at 6 weeks of age                                                                                                        | Prevalence of allergic disease at 18 months.                                          | Prevalence of allergic disease at 4 and 18 months.<br>Leucocytes and eosinophils in peripheral blood                                                     | Questionnaire, SCORAD scoring, lung function<br>Mean leucocytes and eosinophils $\pm$ SD | NS                                                                                                                                                          | 19 participants had BCG repeated at 4 months as they had no scar and negative skin test. |
| Tastan <i>et al</i> 2005[31]            | Randomised trial comparing vaccination at birth or 2 months. Blood taken at 48 hours (group 1 only) 2 months and 4 months (group 2 only) of age. | Healthy, male and female, term newborns in Turkey, n=40.                                                                                                                       | Group 1: BCG vaccine at birth, n=20<br>Group 2: BCG vaccine at 2 months, n=20<br>NB all received routine immunisations including DTP and polio at 2, 4 and 6 months | Total lymphocytes                                                                     | Total lymphocytes, $\alpha\beta$ + T cells and $\gamma\delta$ + T cells                                                                                  | Cells/ $\mu$ l, median value with quartiles.                                             | Significant different between groups at 2 months for total lymphocytes, TCR- (increased in vaccinated) and $\alpha\beta$ + cells (decreased in vaccinated). |                                                                                          |
| van den Biggelaar <i>et al</i> 2009[32] | Case-control                                                                                                                                     | Healthy newborns from PNG (n=50) and Australia (n=50). Healthy Australian adults as                                                                                            | BCG vaccination in PNG newborns. No BCG vaccination in Australian participants                                                                                      | Mononuclear cell culture cytokine production. mRNA expression. Lymphocyte phenotyping | Cytokine (IL-10, IFN- $\gamma$ , TNF- $\alpha$ , IL-5) responses to PHA                                                                                  | Data not reported                                                                        | Not reported                                                                                                                                                |                                                                                          |

|                                         |                                                                                                                                   |                                                                                                                                                                                    |                                                                                                                              |                                                                                                                                                                                                                                                             |                                                                                                                                                                                                                                  |                                                   |                                                                                                                                                                                                                                                            |                                                                                                                                                                        |
|-----------------------------------------|-----------------------------------------------------------------------------------------------------------------------------------|------------------------------------------------------------------------------------------------------------------------------------------------------------------------------------|------------------------------------------------------------------------------------------------------------------------------|-------------------------------------------------------------------------------------------------------------------------------------------------------------------------------------------------------------------------------------------------------------|----------------------------------------------------------------------------------------------------------------------------------------------------------------------------------------------------------------------------------|---------------------------------------------------|------------------------------------------------------------------------------------------------------------------------------------------------------------------------------------------------------------------------------------------------------------|------------------------------------------------------------------------------------------------------------------------------------------------------------------------|
|                                         |                                                                                                                                   | controls (n=15)                                                                                                                                                                    |                                                                                                                              |                                                                                                                                                                                                                                                             |                                                                                                                                                                                                                                  |                                                   |                                                                                                                                                                                                                                                            |                                                                                                                                                                        |
| Vargas <i>et al</i> 2004[33]            | Randomised, placebo controlled trial investigating effect of BCG on asthma. Samples taken before and 12 months after vaccination. | Asthmatic schoolchildren, male and female, in Mexico, n=82 (67 completed study)                                                                                                    | BCG, n=33 or placebo (saline), n=34.<br><br>NB all children were treated for their asthma for 12 months prior to vaccination | Symptoms questionnaire<br>Leukocyte count, eosinophil count, IgE, eosinophils in nasal mucus and parasites in stools.<br><br>Subset (17 vaccinated and 18 placebo) had IL-4 and IFN- $\gamma$ from phorbol myristate acetate and ionomycin stimulated PBMCs | Symptoms questionnaire<br>Leukocyte count, eosinophil count, IgE, eosinophils in nasal mucus and parasites in stools.<br><br>IL-4 and IFN- $\gamma$ from phorbol myristate acetate and ionomycin stimulated PBMCs.               | Cells/mm <sup>3</sup> ,<br><br>IU/ml<br><br>Pg/ml | Within group sig change over time for controls but not for vaccinated for IgE, IL-4 and IFN- $\gamma$ .<br><br>Within group sig decrease in monocytes, eosinophils and % eosinophils in nasal cytology for BCG.<br><br>Between group comparisons not done. |                                                                                                                                                                        |
| Vekemans <i>et al</i> 2004[34]          | Single centre randomized study in newborns and a case-control study in adults                                                     | Healthy newborns (n= 29)<br><br>Adults with tuberculosis (n=33), TB exposed (n=21), living in the vicinity of TB subjects (n=22) and heavily TB exposed health care workers (n=23) | BCG at birth compared to 2 months of age<br><br>Adults were not vaccinated                                                   | PBMC IFN- $\gamma$ responses to mycobacterial antigens and controls<br><br>PBMC IL-13 production (in adults)                                                                                                                                                | PBMC IFN- $\gamma$ production to PHA and TT (not reported for newborns)                                                                                                                                                          | pg/ml                                             | Not reported                                                                                                                                                                                                                                               |                                                                                                                                                                        |
| Vijaya Lakshmi V, <i>et al</i> 2005[35] | Case-control study (vaccination was performed retrospectively)                                                                    | Children aged 5-7 years who had been vaccinated with BCG (n=45), unvaccinated (n=31) or had active TB (n=31)                                                                       | BCG vaccination compared to unvaccinated and active TB patients (vaccination was retrospective)                              | Lymphoproliferation and cytokine responses                                                                                                                                                                                                                  | IL-2 dependent cell line proliferation supplemented with supernatant from lymphocyte culture stimulated with control antigens<br><br>IFN- $\gamma$ levels in supernatant of lymphocyte cultures stimulated with control antigens | Stimulation index<br><br>pg/ml                    | Higher stimulation index of lymphocyte transformation for vaccinated vs unvaccinated healthy children (p<0.05)<br><br>Increased IFN- $\gamma$ in vaccinated children (p<0.01)                                                                              |                                                                                                                                                                        |
| Weir <i>et al</i> 2004[36]              | Randomised, controlled trial, multiple regions                                                                                    | Healthy young adults from Northern Malawi (n= 633, mean age 19 years) and East London and Essex, United Kingdom (n=424, mean age 14 years)                                         | BCG vaccination compared to placebo                                                                                          | Cytokine responses to mycobacterial antigens.                                                                                                                                                                                                               | Cytokines (TNF- $\alpha$ , IL-10, IL-1 $\beta$ ) from whole blood culture supernatants                                                                                                                                           | Median responses<br>pg/ml                         | TNF- $\alpha$ - NS<br><br>IL-10 decrease from baseline in Malawi subjects for <i>M. scrofulaceum</i> and <i>M. vaccae</i> only (p=0.015 and 0.02)                                                                                                          | Study carried out in the context of the Karonga Prevention Study, a large vaccine trial and epidemiological study of tuberculosis and leprosy in the Karonga district. |
| Weir <i>et al</i> Oct. 2008[37]         | Single region case-control study                                                                                                  | Healthy young adults from East London and Essex,                                                                                                                                   | BCG vaccination compared to unvaccinated                                                                                     | IFN- $\gamma$ responses to mycobacterial antigens.                                                                                                                                                                                                          | IFN- $\gamma$ responses to control antigens                                                                                                                                                                                      | %>63pg/ml and %>250pg/ml                          | NS                                                                                                                                                                                                                                                         |                                                                                                                                                                        |

|                                   |                                                                       |                                                                                                                                                                                                                                                                       |                                                |                                                                                                                       |                                                                               |       |    |  |
|-----------------------------------|-----------------------------------------------------------------------|-----------------------------------------------------------------------------------------------------------------------------------------------------------------------------------------------------------------------------------------------------------------------|------------------------------------------------|-----------------------------------------------------------------------------------------------------------------------|-------------------------------------------------------------------------------|-------|----|--|
|                                   |                                                                       | United Kingdom<br>(n=424, mean age<br>14 years)                                                                                                                                                                                                                       |                                                |                                                                                                                       |                                                                               |       |    |  |
| Weir <i>et al</i> Jan<br>2008[38] | Follow-on study of<br>three separate, open<br>label randomized trials | UK adolescents.<br>Unvaccinated 12-14<br>year olds n=213<br><br>Vaccinated 3 years<br>prior, 17-18 year<br>olds n=20<br><br>Vaccinated in first<br>year of life, 12-14<br>year olds n=43 with<br>212 similar aged<br>children who were<br>unvaccinated as<br>controls | BCG vaccination<br>compared to<br>unvaccinated | IFN- $\gamma$ from supernatants<br>of whole blood assays<br>stimulated with<br>mycobacterial antigens<br>and controls | Controls used for IFN- $\gamma$<br>from supernatants of<br>whole blood assays | pg/ml | NS |  |



**Table B. Characteristics of included measles vaccine studies**

| Author                        | Methods                                                                                                                                                                                                                                                 | Participants                                                                                                                                                                         | Interventions                                                                                                                                                                                                                                                               | Outcomes                                                                                                                                                                                                      | Non-specific outcomes                                                                                        | Method of reporting non-specific outcomes                                                                                                                                    | Difference in NSE outcome                                                                                    | Notes                                                                                                                          |
|-------------------------------|---------------------------------------------------------------------------------------------------------------------------------------------------------------------------------------------------------------------------------------------------------|--------------------------------------------------------------------------------------------------------------------------------------------------------------------------------------|-----------------------------------------------------------------------------------------------------------------------------------------------------------------------------------------------------------------------------------------------------------------------------|---------------------------------------------------------------------------------------------------------------------------------------------------------------------------------------------------------------|--------------------------------------------------------------------------------------------------------------|------------------------------------------------------------------------------------------------------------------------------------------------------------------------------|--------------------------------------------------------------------------------------------------------------|--------------------------------------------------------------------------------------------------------------------------------|
| Bertley <i>et al</i> 2004[39] | Follow on to a randomised, controlled trial. Samples taken before vaccination, at 9 months and at 5 years.                                                                                                                                              | 5 year old children in Sudan who had previously taken part in a measles vaccine RCT. Recruited from 6/14 of the communities in the original trial.                                   | At 5 months of age: Connaught high titre measles vaccine, n=61 or meningococcal A+C vaccine as control, n=59.<br><br>All received standard titre Schwarz vaccine at 9 months.<br><br>A third group from the original trial (single high dose EZ vaccine) were not included. | Neutralizing antibodies.<br><br>Lymphoproliferation to measles virus (at 5 years only)                                                                                                                        | Lymphoproliferation to Vero control stimulus.                                                                | CPM                                                                                                                                                                          | NS (comparable across groups, details not given)                                                             | Follow-on study                                                                                                                |
| Gans <i>et al</i> 1999[40]    | Cohort study, all infants vaccinated and blood taken before and 12 weeks after immunisation.                                                                                                                                                            | Healthy infants in the USA aged: 6months (N=60), 9 months (N=46) 12 months (N=56)<br>And Healthy adults aged 20-40 years who had previously had at least one measles vaccine (N=29). | 6 and 9 month old infants: Monovalent Edmonson strain measles vaccine (Attenuvax)<br>12month old infants: MMR<br>Adults: no vaccination given                                                                                                                               | Measles specific T cell proliferation, IL-2 and IFN- $\gamma$ production. Effect of passive measles antibody and rhIL-12 on above. T cell proliferation to PHA (not fully reported). Measles antibody titres. | IL-12, IFN- $\gamma$ , and T cell proliferation to PHA (not fully reported).                                 | Mean CPM with standard error and pg/ml.                                                                                                                                      | NS (p value not given)                                                                                       | Post vaccine samples available for 134/162 infants but not all tested for all assays. Non-specific effects not fully reported. |
| Gans <i>et al</i> 2004[41]    | Case control study. Cases received measles vaccine at 6 or 9 months then MMR at 12 months. Blood taken before and 12 weeks after first vaccination then 24 weeks after MMR. Controls enrolled at 12 months. Bloods taken before and 24 weeks after MMR. | Cases: Infants receiving well-child care in California aged 6 (N=32) or 9 (M=23) months.<br>Controls: 12month infants (N=83)                                                         | Cases: Monovalent Measles vaccine (Attenuvax) at 6 or 9 months followed by MMR at 12 months<br><br>Controls: MMR at 12 months                                                                                                                                               | Measles antibody, (passive and non) after 1 and 2 doses. T cell proliferation to measles antigen and PHA (not reported).                                                                                      | T cell proliferation to PHA (not reported).                                                                  | Results not reported                                                                                                                                                         | Not reported                                                                                                 | Not all sample sizes allowed for full immunological evaluation. Non-specific effects not reported.                             |
| Hennino <i>et al</i> 2007[42] | Prospective, double-blinded, randomized, placebo-controlled                                                                                                                                                                                             | 10-14month-old males and female infants in the USA with atopic dermatitis, N=12,                                                                                                     | Single Schwartz strain measles vaccination at 10-14months or placebo (physiological serum)                                                                                                                                                                                  | Severity of atopic dermatitis, seroconversion, serum levels of CCL18 and E-selectin 1 month post vaccination.                                                                                                 | Severity of atopic dermatitis, seroconversion, serum levels of CCL18 and E-selectin 1 month post vaccination | Individual SCORAD eczema severity score for 6 randomly chosen infants.<br><br>Serum levels of CCL18 and E-selectin in ng/ml for six participants before and after treatment. | NS<br><br>CCL18 decrease in 2 individual measles treated subjects compared to baseline (p=0.0183 and 0.0011) | All children had atopic dermatitis                                                                                             |
| Hussey <i>et al</i> 1996[43]  | Cohort study with 3 groups (different                                                                                                                                                                                                                   | Healthy infants attending 2                                                                                                                                                          | Group 1: EZ vaccine (medium titre) at 6                                                                                                                                                                                                                                     | Measles antibody responses. Proliferation,                                                                                                                                                                    | Proliferation, IL-2 receptor, CD4, CD8, $\beta$ 2                                                            | Median CPM, U/ml (sIL-2r, CD4, CD8),                                                                                                                                         | Decrease in PHA proliferation in                                                                             | Study commenced before WHO                                                                                                     |

|                               |                                                                                                 |                                                                                                                                                                                                                                                                                                                                                  |                                                                                                              |                                                                                                                                              |                                                                                 |                                                         |                                                                                                                                                                                                                                                                                                                                                                                                                                      |                                                                                                                                                |
|-------------------------------|-------------------------------------------------------------------------------------------------|--------------------------------------------------------------------------------------------------------------------------------------------------------------------------------------------------------------------------------------------------------------------------------------------------------------------------------------------------|--------------------------------------------------------------------------------------------------------------|----------------------------------------------------------------------------------------------------------------------------------------------|---------------------------------------------------------------------------------|---------------------------------------------------------|--------------------------------------------------------------------------------------------------------------------------------------------------------------------------------------------------------------------------------------------------------------------------------------------------------------------------------------------------------------------------------------------------------------------------------------|------------------------------------------------------------------------------------------------------------------------------------------------|
|                               | vaccine and ages). Blood taken before, 2 weeks and 3 months after vaccination.                  | immunisation clinics in Cape Town, SA (one in high measles prevalence area and one in low measles area)<br>Group 1: (high prevalence) 6 months old, N=38.<br>Group 2: (high prevalence) 6 months old, N=26.<br>Group 3: (low prevalence) 9 months old, N=24.                                                                                     | months<br>Group 2: Schwarz vaccine (medium titre) at 6 and 9 months<br>Group 3: Schwarz vaccine at 9 months. | IL-2 receptor, CD4, CD8, $\beta$ 2 microglobulin and Neopterin in response to PHA. Lymphocyte subsets. Comparison between males and females. | microglobulin and Neopterin in response to PHA. Lymphocyte subsets.             | mg/L ( $\beta$ 2 microglobulin) and nmol/L (Neopterin). | Schwarz strain groups at 3 months post immunization (p=0.013, 0.002). Decrease in PHA proliferation at 2 months post immunisation in Schwarz strain at 9 months group (p<0.001). Increase in soluble CD8 (p=0.02) and $\beta$ 2 microglobulin (p=0.04) from baseline in Schwarz strain at 9 months group. Difference between all groups for soluble IL-2 receptor (p<0.001), soluble CD4 (p=0.015) and absolute CD8 count (p=0.008). | recommendation to withdraw EZ vaccine                                                                                                          |
| Jaye <i>et al</i> 2014[44]    | Case-control study (disease versus vaccinated)                                                  | Children and adults with acute measles. Healthy newborns (n=22)                                                                                                                                                                                                                                                                                  | Measles vaccination at 9 months of healthy children recruited at birth                                       | Cytotoxic T cell assays                                                                                                                      | Controls used for cytotoxic T cell assays                                       | Data not reported                                       | Not reported                                                                                                                                                                                                                                                                                                                                                                                                                         |                                                                                                                                                |
| Liguori <i>et al</i> 1998[45] | Cohort study, All children vaccinated and bloods taken before, 5 and 15 days after vaccination. | Healthy children in Italy, males and females, aged 5-9 years with no history of measles, N=20.                                                                                                                                                                                                                                                   | Single Schwarz strain measles vaccine (Rimevax) at baseline.                                                 | Measles IgG and IgM. Serum TNF- $\alpha$ , IFN- $\alpha$ and IFN- $\gamma$ .                                                                 | Serum TNF - $\alpha$ , IFN- $\alpha$ and IFN- $\gamma$ .                        | pg/ml for each individual subject.                      | NS                                                                                                                                                                                                                                                                                                                                                                                                                                   | Funding source not reported                                                                                                                    |
| Lisse <i>et al</i> 1994[46]   | Case-control, follow-on study of 2 previous trials.                                             | All participants from capital of Guinea-Bissau<br>Cases: From trial 1- all children who had received medium titre EZ vaccine at 4months, now aged 5 years.<br>From trial 2-children who had received either medium or high dose EZ vaccine at 4 months, now aged 3-4years.<br>Controls: Children from previous trials who received standard dose | Follow-on study, no new interventions                                                                        | Total white cells and lymphocyte subsets (presented for each trial and by sex).                                                              | Total white cells and lymphocyte subsets (presented for each trial and by sex). | Median cell counts/% cells with interquartile range.    | Lower percentage of lymphocytes and CD4:CD8 ratio and higher percentage and total CD8 cells in females receiving high titre EZ strain (p<0.05).                                                                                                                                                                                                                                                                                      | 330 of the 854 originally recruited provided samples for this follow-on study. Mortality data is presented elsewhere in Aaby <i>et al</i> 1993 |

|                                    |                                                                                                                                                                                                       |                                                                                                                                                                     |                                                                                                                                                                                                                                            |                                                                                                                                                                                                                                                                                                                              |                                                                                                                                                                   |                                                                                                                                                                                                              |                                                                                                                                                                                                                                                                            |                                                                                                                                                                       |
|------------------------------------|-------------------------------------------------------------------------------------------------------------------------------------------------------------------------------------------------------|---------------------------------------------------------------------------------------------------------------------------------------------------------------------|--------------------------------------------------------------------------------------------------------------------------------------------------------------------------------------------------------------------------------------------|------------------------------------------------------------------------------------------------------------------------------------------------------------------------------------------------------------------------------------------------------------------------------------------------------------------------------|-------------------------------------------------------------------------------------------------------------------------------------------------------------------|--------------------------------------------------------------------------------------------------------------------------------------------------------------------------------------------------------------|----------------------------------------------------------------------------------------------------------------------------------------------------------------------------------------------------------------------------------------------------------------------------|-----------------------------------------------------------------------------------------------------------------------------------------------------------------------|
|                                    |                                                                                                                                                                                                       | Schwarz vaccine at 9months.                                                                                                                                         |                                                                                                                                                                                                                                            |                                                                                                                                                                                                                                                                                                                              |                                                                                                                                                                   |                                                                                                                                                                                                              |                                                                                                                                                                                                                                                                            |                                                                                                                                                                       |
| Njie-Jobe <i>et al</i> 2012[47]    | Randomised trial comparing children vaccinated at 4 and 9 months or just 9 months. Bloods at baseline, 4, 9 or 9.5 (randomized to tests for memory or effector response), 18, 36, 36.5 and 48 months. | Gambian infants, male and female, initially recruited at 4 months of age, N=132                                                                                     | Group 1 (N=64): Measles vaccine at 9 and 36 months<br>Group 2 (n=68): EZ measles vaccine at 4,9 and 36 months<br><br>NB both groups also received routine EPI vaccines including DTP, HepB, Hib, oral polio and at 9 months, yellow fever. | Measles HAI. IFN $\gamma$ ELISpot effector responses to measles, uninfected Vero cells, measles fusion peptides and PHA. FOXP3 mRNA expression. IFN $\gamma$ , IL-10, IL-2R $\alpha$ and MIP-1 $\beta$ levels. CD8 and CD4 cells expressing IFN $\gamma$ and/or CD69.<br><br>NB Not all assays performed at all time-points. | ELISpot IFN- $\gamma$ response to uninfected Vero cells and PHA (data not reported).<br><br>Plasma IFN $\gamma$ , IL-10, IL-2R $\alpha$ and MIP-1 $\beta$ levels. | Median cytokines level in pg/ml with interquartile range.                                                                                                                                                    | NS                                                                                                                                                                                                                                                                         |                                                                                                                                                                       |
| Okada <i>et al</i> 2001[48]        | Case-control comparing age-matched measles patients with 1-2 year-old children immunized with measles vaccine.                                                                                        | Cases: uncomplicated, acute measles patients in Tokyo area, aged 1-2 years. N=147.<br>Controls: healthy children aged 1-2 years who received measles vaccine. N=32. | Controls received measles vaccine, either AIK-C strain or Schwarz strain, further details not reported.                                                                                                                                    | Total lymphocyte count, CD4, CD8 and B cells. Evidence of apoptosis of PBMC (through analysis of DNA fragmentation). NK cells (data not reported). Measles antibody responses.                                                                                                                                               | Total lymphocyte count, CD4, CD8 and B cells. Evidence of apoptosis of PBMC (through analysis of DNA fragmentation). NK cells (data not reported).                | Cells per $\mu$ L, each point representing average of 3-15 samples.<br><br>Mean % apoptosis and cell surface expression of Fas, FasL or TRAIL-Rs.<br><br>Mean cytokine levels in pg/ml (ng/ml for Sol-FasL). | NS                                                                                                                                                                                                                                                                         | NB for purposes of this SR, only the results for the vaccinated cohort have been included                                                                             |
| Ovsyannikova <i>et al</i> 2003[49] | Cohort study with two groups of different ages. Randomly assigned to undergo single phlebotomy on one day 0-40 days post intervention.                                                                | Healthy infants/children in the USA, male and female.<br>Group 1: 12-15month-old, N=15.<br>Group 2: 4-12year-old, N=42                                              | Single Edmonson strain measles vaccination                                                                                                                                                                                                 | PHA stimulated cytokine production (IL-2, IL-4, IL-6, IFN- $\gamma$ and TNF- $\alpha$ ), plasma cytokine levels, measles antibody titres.                                                                                                                                                                                    | PHA stimulated cytokine production (IL-2, IL-4, IL-6, IFN- $\gamma$ and TNF- $\alpha$ ), plasma cytokine levels.                                                  | Median cytokine concentration in pg/ml (different children at each time-point) with interquartile range.                                                                                                     | In children decrease in IFN- $\gamma$ to PHA at day 20. Higher overall median IFN- $\gamma$ to PHA in children compared to infants<br>Decrease in median plasma IFN- $\gamma$ (p=0.0027), TNF- $\alpha$ (p=0.0001), and sIL2-R (p=0.0001) in children compared to infants. | Each subject had single blood draw therefore results at each time point are different children. Day 0 children (N=2 and 7) did not receive vaccine before blood draw. |
| Pabst <i>et al</i> 1999[50]        | Case-control comparing children of mothers who either had natural measles or were vaccinated against measles plus separate cohort vaccinated with                                                     | Group 1: 6 month-old infants whose mothers were assumed to have had measles, N=61.<br>Group 2a: 6 month-old infants whose mother were known                         | Group 1 and 2a: Single dose of standard titre AIK-C measles vaccine at 26-32 weeks<br>Group 2b: Single dose of standard titre Connaught (CLL) measles vaccine at 26-32 weeks                                                               | Reactogenicity. Measles specific antibody. Blast transformation to measles HA antigen. Production of IFN- $\gamma$ and IL-10 stimulated by measles antigen, TT, non-measles infected                                                                                                                                         | Production of IFN- $\gamma$ and IL-10 stimulated by PHA. Blast transformation to TT, non-measles infected Vero cells and Candida.                                 | Pg/ml, mean $\pm$ standard deviation.<br><br>Mean CPM $\pm$ standard deviation.                                                                                                                              | NS                                                                                                                                                                                                                                                                         | Measles vaccine was given immediately after the third dose of DTP-Polio-Hib.<br><br>Part funding provided by Merck-Frost, Canada                                      |

|                               |                                                                                                                                                                                                                                         |                                                                                                                                                               |                                                                                                                                                                                                                                                 |                                                                                                                                    |                                                                                                    |                                                                                                                    |                                                                                                                                                                                                                                                                                                                                                                                                                                                                                                     |                                       |
|-------------------------------|-----------------------------------------------------------------------------------------------------------------------------------------------------------------------------------------------------------------------------------------|---------------------------------------------------------------------------------------------------------------------------------------------------------------|-------------------------------------------------------------------------------------------------------------------------------------------------------------------------------------------------------------------------------------------------|------------------------------------------------------------------------------------------------------------------------------------|----------------------------------------------------------------------------------------------------|--------------------------------------------------------------------------------------------------------------------|-----------------------------------------------------------------------------------------------------------------------------------------------------------------------------------------------------------------------------------------------------------------------------------------------------------------------------------------------------------------------------------------------------------------------------------------------------------------------------------------------------|---------------------------------------|
|                               | different measles vaccine. All children vaccinated, bloods taken before and 8 weeks after vaccination.                                                                                                                                  | to be vaccinated against measles, N=119.<br>Group 2b: 6 month-old infants whose mothers were known to be vaccinated against measles, N=120                    |                                                                                                                                                                                                                                                 | Vero cells, PHA and Candida                                                                                                        |                                                                                                    |                                                                                                                    |                                                                                                                                                                                                                                                                                                                                                                                                                                                                                                     |                                       |
| Samb <i>et al</i> 1995[51]    | Case-control study.                                                                                                                                                                                                                     | Rural Senegalese children who had received EZ vaccine at 5 months (n=73) and children who had received placebo at 5 months followed by Schwarz vaccine (n=70) | Rabies vaccine                                                                                                                                                                                                                                  | Immunogenicity to measles, yellow fever and rabies vaccines. Skin tests. Haematological parameters.                                | Rabies and Yellow fever immune responses.<br><br>CD3, CD4, and CD8 lymphocyte counts               | YF – Log2 neutralization antibodies<br><br>Rabies – Log10 reduction neutralization<br><br>x10 <sup>6</sup> cells/L | NS<br><br>Females who received EZ had a higher rabies neutralization (p=0.012) and ELISA (p=0.03) antibody.                                                                                                                                                                                                                                                                                                                                                                                         |                                       |
| Schnorr <i>et al</i> 2001[52] | Quasi-RCT comparing unmatched controls with those immunised at 4 and 9 months or 9 months only. Comparison of Blood at recruitment for controls or 7 days after vaccination for vaccinated groups and at 6 and 24 weeks for all groups. | Bangladeshi infants aged 6 and 9 months of age. NB unmatched controls median age 10.1 months (range 6-18m). Total n= 78                                       | Group V6: Standard titre measles vaccine (2/3 had standard titre EZ and 1/3 had Schwarz) at 4 and 9 months, n=24.<br>Group V9: As above at 9 months only, n=25<br>Controls: no vaccination, n=29.<br><br>All received Vitamin A on recruitment. | Measles antibody levels.<br><br>Delayed hypersensitivity skin test.<br><br>Cytokine responses in response to stimulation with PHA. | Delayed hypersensitivity skin test.<br><br>Cytokine responses in response to stimulation with PHA. | Geometric mean cytokine production I pg/ml                                                                         | Increased anergy to candida in DTH assay (p=0.015 for 6 month group and p=0.04 for 9 month group) Difference in CD71 (p=0.04), and CD30 (p=0.004) expression between groups at baseline. Difference in expression of CD25 (p=0.02), CD69 (p=0.04), CD71 (p=0.04), and CD30 (p=0.006) between groups from week 0 to week 6. Difference in expression of NK (p=0.009) and CD69 (p=0.03) between groups at week 24. Increased IL-2 (p=0.007) at 6 weeks and IL-10 (p=0.04) at 24 weeks between groups. | All received vitamin A on recruitment |

**Table C. Characteristics of included MMR vaccine studies**

| Author                             | Methods                                                                                                                                                                                   | Participants                                                                                          | Interventions                                                                                                                      | Outcomes                                                                                                                                                                                                 | Non-specific outcomes                                                                                                                                                                   | Method of reporting non-specific outcomes                                                                                                                                                                                                | Difference in NSE outcome                                                                                                                                                                                    | Notes                                                                                                                               |
|------------------------------------|-------------------------------------------------------------------------------------------------------------------------------------------------------------------------------------------|-------------------------------------------------------------------------------------------------------|------------------------------------------------------------------------------------------------------------------------------------|----------------------------------------------------------------------------------------------------------------------------------------------------------------------------------------------------------|-----------------------------------------------------------------------------------------------------------------------------------------------------------------------------------------|------------------------------------------------------------------------------------------------------------------------------------------------------------------------------------------------------------------------------------------|--------------------------------------------------------------------------------------------------------------------------------------------------------------------------------------------------------------|-------------------------------------------------------------------------------------------------------------------------------------|
| Nakayama <i>et al</i> 1990[53]     | Cohort study. All children vaccinated and blood taken before and 6 weeks after vaccination. A subset of children also had bloods at 3,7,10 days and 2,3,5 and 10 weeks after vaccination. | Healthy children who visited outpatients in Tokyo aged 1-5years, N=229.                               | MMR vaccine containing measles AIK-C strain, Mumps Hoshino strain and Rubella Takahashi strain, single dose at baseline.           | IFN- $\alpha$ responses to measles, mumps and rubella- subset of 11 children only.<br>Measles and Rubella serum antibodies (paired serum for all subjects).                                              | Non-stimulated controls (not reported).                                                                                                                                                 | Results not reported.                                                                                                                                                                                                                    | Not reported                                                                                                                                                                                                 | No non-specific effects are reported and only non-stimulated control experiments were performed.<br><br>Funding source not reported |
| Pabst <i>et al</i> 1997[54]        | Cohort study, all infants vaccinated and blood taken before and either 14 (N=32), 22 (N=32), 30 (N=27) or 38 (N=33) days after vaccination.                                               | 12 month infants from Edmonton, Canada, N=124                                                         | MMR given within 4 weeks of first birthday                                                                                         | Blast transformation of PBMC to measles antigen, Vero cell control antigen, TT and Candida antigen.<br>Production of sIL-2r, IFN- $\gamma$ , IL-4 and IL-10 stimulated by PHA.<br>CD4, CD8 and NK cells. | Blast transformation of PBMC to Vero cell control antigen, TT and Candida antigen.<br>Production of sIL-2r, IFN- $\gamma$ , IL-4 and IL-10 stimulated by PHA.<br>CD4, CD8 and NK cells. | CPM, mean and standard error of mean.<br><br>pg/ml, mean and standard error of mean.<br><br>% of PBMC, mean and standard error of mean.                                                                                                  | Significant change over time<br><br>Significant change over time<br><br>Significant change over time                                                                                                         | Not all children assessed at each time point.<br><br>Part funding provided by Merck-Frost, Canada                                   |
| Rager-Zisman <i>et al</i> 2003[55] | Cohort study, all children vaccinated and blood taken before and 30 days after vaccination.                                                                                               | Healthy Israeli children; age 6.14 ( $\pm$ 0.35) years with previous MMR vaccination in infancy. N=38 | Single MMR vaccination (MMRII)<br><br>Note: subjects had previously received MMR in infancy and had recently had a tetanus booster | Measles, mumps and rubella IgG, total IgM, IgG and IgE. White cell count, CD8, CD4 and CD4:CD8.<br>Lymphoproliferative responses to PHA and TT. NK cells and NK specific activity.                       | White cell count, CD8, CD4 and CD4:CD8.<br><br>Lymphoproliferative responses to PHA and TT.<br><br>NK cells and NK specific activity.                                                   | Median white blood cell count (x1000/ $\mu$ l), % CD4, %CD8 and CD4:CD8 ratio with interquartile range before and after vaccination.<br><br>Mean and standard error of the mean CPM.<br><br>Mean and standard error of mean %CD56 cells. | Sig decrease in total leukocytes (p<0.0001), %CD4 (p=0.028) and %CD8 cells (p=0.041) before and after immunisation.<br><br>Response to TT sig increase (p=0.006)<br><br>Sig increase in CD56+ cells (p=0.01) | Number of children tested varies by assay (N=28-38)                                                                                 |

**Table D. Characteristics of included tetanus toxoid vaccine studies**

| Author                                     | Methods                                                                                                               | Participants                                                                                                                                                | Interventions                                                                                                                         | Outcomes                                                                               | Non-specific outcomes                                                                                                                        | Method of reporting non-specific outcomes                                                                                  | Difference in NSE outcome                                                              | Notes |
|--------------------------------------------|-----------------------------------------------------------------------------------------------------------------------|-------------------------------------------------------------------------------------------------------------------------------------------------------------|---------------------------------------------------------------------------------------------------------------------------------------|----------------------------------------------------------------------------------------|----------------------------------------------------------------------------------------------------------------------------------------------|----------------------------------------------------------------------------------------------------------------------------|----------------------------------------------------------------------------------------|-------|
| Armitage <i>et al</i> 1993[56]             | Case-control, comparing responses in elderly to young adults                                                          | Healthy elderly (n=23, mean age 75) and young adults (n=23, mean age 27)                                                                                    | Tetanus toxoid vaccination depending on prior vaccination history                                                                     | Immunogenicity, proliferation and blastogenesis                                        | Lymphoproliferation to PHA and ConA                                                                                                          | cpm                                                                                                                        | Decrease in ConA and PHA blastogenesis in elderly vs young adults (p=0.01 and p=0.001) |       |
| Borut <i>et al</i> 1980[57]                | Case-control, comparing agammaglobulinaemic subjects to immunised and unimmunised subjects. Retrospective vaccination | Agammaglobulinaemic (n=7, aged 12-27 years), unimmunised (n=9, aged 4-20 weeks), and immunised (n=64, age 8 weeks - 50 years)                               | Vaccination status determined by history (any individual who received TT within 10 years prior to the study was considered immunised) | Skin testing, proliferation, monocyte chemotaxis and immunogenicity                    | Monocyte chemotaxis                                                                                                                          | Number of cells per high powered field                                                                                     | Higher monocyte chemotaxis in those with positive Tetanus toxoid skin test, p<0.01.    |       |
| Chollet <i>et al</i> 1979[58]              | Case-control                                                                                                          | Healthy adults (n=24 in the vaccine arm and n=51 controls)                                                                                                  | Boosting with tetanus toxoid compared to no boosting                                                                                  | Lymphocyte proliferation, phenotyping (by electrophoresis), cytotoxicity, and rosettes | B, T1 and T2 cell phenotypes by electrophoresis<br><br>Lymphoproliferation to PHA, PWM, ConA                                                 | %<br><br>Stimulation index                                                                                                 | Significant increase in T2 population over time in 6 of the vaccinated group.          |       |
| Chui <i>et al</i> 2004[59]                 | Case-control                                                                                                          | Healthy adults cases (n=6, 39.8±7.2 years) and controls (n=6, 36.8±5.4 years)                                                                               | Flt3-ligand and tetanus toxoid vaccination compared to tetanus toxoid vaccination only                                                | Skin tests, proliferation, IFN-γ and immunogenicity.                                   | Lymphoproliferation to PHA<br><br>IFN-γ ELISpot to PHA, HBsAg and media alone                                                                | Stimulation index<br><br>Spots per 100 000 cells (not reported)                                                            | Not reported                                                                           |       |
| Cooper <i>et al</i> 1998[60]               | Case-control study conducted within two Ecuadorian communities                                                        | <i>Onchocera volvulus</i> infected (n=19, median age 36, range 15-75 years) and uninfected (n=20, median age 36, range 17-67 years) adults                  | Tetanus toxoid vaccination (2 doses 1 month apart) in both cohorts                                                                    | Proliferation, cytokines and immunogenicity                                            | Positive and negative controls of PBMC proliferation assays (data not reported in manuscript).<br><br>PBMC cytokine production               | Antigen stimulated assays were reported as geometric mean stimulation index with 95% CIs<br><br>Median (pg/ml) and 95% CIs | NS<br><br>NS                                                                           |       |
| Di Genova <i>et al</i> 2006[61] (Also BCG) | Cohort study                                                                                                          | Healthy adults (n=12, age range 31-44 years), all had previously received TT vaccination over 5 years prior. All subjects had also received BCG vaccination | Tetanus toxoid vaccination                                                                                                            | PBMC and T cell proliferation and cytokine responses                                   | Memory T cell proliferative responses to <i>Candida albicans</i><br><br>IFN-γ, IL-2 and IL-13 responses to <i>C. albicans</i> , and controls | Mean stimulation index ± SD<br><br>Number of spots/2x10 <sup>5</sup> PBMC                                                  | Individual results given, overall significance not reported.                           |       |
| Fernandez <i>et al</i> 1994[62]            | Cohort study                                                                                                          | Healthy males (n=3, age range 25-40 years)                                                                                                                  | Tetanus toxoid vaccination in all subjects (1 subject received TT 2 years prior, and 2 subjects received TT 8-9 years prior)          | Immunogenicity, proliferation, cytokine production                                     | Lymphoproliferation to PPD<br><br>PBMC production of TNF-β and IL-2 in the presence of media ± IL-2                                          | CPM<br><br>Number of positive cells/100 000 PBMCs                                                                          | Not reported                                                                           |       |
| Fevrier <i>et al</i>                       | Cohort study                                                                                                          | Adults (n=7, age                                                                                                                                            | Tetanus toxoid                                                                                                                        | Lymphoproliferation                                                                    | Positive and negative                                                                                                                        | Mean cpm ± SD                                                                                                              | Not reported                                                                           |       |

|                                   |                                              |                                                                                               |                                                                                                                            |                                                                                                        |                                                                                                                                                                                                                                                                                                                        |                                                                                                                             |                                                                                                                                                                                                                                                |                                                        |
|-----------------------------------|----------------------------------------------|-----------------------------------------------------------------------------------------------|----------------------------------------------------------------------------------------------------------------------------|--------------------------------------------------------------------------------------------------------|------------------------------------------------------------------------------------------------------------------------------------------------------------------------------------------------------------------------------------------------------------------------------------------------------------------------|-----------------------------------------------------------------------------------------------------------------------------|------------------------------------------------------------------------------------------------------------------------------------------------------------------------------------------------------------------------------------------------|--------------------------------------------------------|
| 1977[63]                          |                                              | range 30-40 years)                                                                            | vaccination. 2 subjects never previously vaccinated.                                                                       | (including B and T cell subsets)                                                                       | control lymphocyte (non-separated, B and T cell) proliferation                                                                                                                                                                                                                                                         |                                                                                                                             |                                                                                                                                                                                                                                                |                                                        |
| Gentile <i>et al</i> 2006[64]     | Case-control study                           | Adults with (n=15, mean age 27 years) and without (n=15, mean age 27 years) allergic rhinitis | Tetanus toxoid vaccination in all subjects                                                                                 | PBMC cytokine responses, skin testing to allergens and TT immunogenicity                               | IFN- $\gamma$ and IL-13 responses to PHA                                                                                                                                                                                                                                                                               | Mean (pg/ml)                                                                                                                | PHA and TT induced IFN- $\gamma$ were increased on days 7 and 14 for the non-allergic rhinitis vs allergic rhinitis group (p<0.05). PHA induced IL-13 was increased on day 7 for the non-allergic rhinitis vs allergic rhinitis group (p<0.05) |                                                        |
| Livingston <i>et al</i> 2013[65]  | Single centre, cohort study                  | Healthy adults (n=8 mean age 33 $\pm$ 10 years)                                               | Tetanus toxoid vaccination.                                                                                                | PBMC proliferation, cytokine responses, cellular phenotyping and <i>in vitro</i> antibody production   | PBMC proliferation to PBS<br><br>CD4+CD3+ T cell Proliferation to PBS<br><br>Intracellular CD4+CD3+ T cell IFN- $\gamma$ , TNF- $\alpha$ , IL-2, IL-17, IL-10, IL-5, IL-13 and IL-4 produced to PBS<br><br>Intracellular PBMC IFN- $\gamma$ , TNF- $\alpha$ , IL-2, IL-17, IL-10, IL-5, IL-13 and IL-4 produced to PBS | Percentage CD25+ and CD69+, CD3+CD4+ T cells<br>Percentage CD3+CD4+ T cells<br><br>Percentage CD3+CD4+ T cells<br><br>pg/ml | Significant differences between PBS and TT stimulation only reported.                                                                                                                                                                          |                                                        |
| Mahalingham <i>et al</i> 2010[66] | Randomised, double blinded, controlled trial | Healthy females (n=108, age range 18-25 years)                                                | Tocotrienol-rich fraction supplementation (palm oil) compared to placebo. All subjects received Tetanus toxoid vaccination | Lymphoproliferation, cytokines in culture supernatants, TT immunogenicity and plasma Vitamin E levels. | IFN- $\gamma$ and IL-4 production in response to ConA<br><br>IL-6 production in response to LPS                                                                                                                                                                                                                        | pg/ml<br><br>pg/ml                                                                                                          | Increase in ConA induced IFN- $\gamma$ and IL-4 at day 56 for both groups (p<0.001). Increase in IL-6 to LPS in the intervention group at day 56 (p<0.001).                                                                                    | Supported by a grant from the Malaysian Palm Oil Board |

**Table E. Characteristics of included DTP and DT vaccine studies**

| Author                          | Methods                                                                                                                                                                                           | Participants                                                                                                                                                                                  | Interventions                                                                                                                                                                                                                                                                         | Outcomes                                                                                                                                                                                                                      | Non-specific outcomes                                                                                        | Method of reporting non-specific outcomes                                                                                                                   | Difference in NSE outcome                                                                                                                                                          | Notes                                                                                                                                                                                                                                |
|---------------------------------|---------------------------------------------------------------------------------------------------------------------------------------------------------------------------------------------------|-----------------------------------------------------------------------------------------------------------------------------------------------------------------------------------------------|---------------------------------------------------------------------------------------------------------------------------------------------------------------------------------------------------------------------------------------------------------------------------------------|-------------------------------------------------------------------------------------------------------------------------------------------------------------------------------------------------------------------------------|--------------------------------------------------------------------------------------------------------------|-------------------------------------------------------------------------------------------------------------------------------------------------------------|------------------------------------------------------------------------------------------------------------------------------------------------------------------------------------|--------------------------------------------------------------------------------------------------------------------------------------------------------------------------------------------------------------------------------------|
| Dirix <i>et al</i> 2009[67]     | Cohort study. Blood taken at 2 (before vaccination, N=42), 3 (n=28) and/or 6 (N=24) months of age and at around 13 months (N=5)                                                                   | Infants in Belgium aged 2-13 months with HIV positive mothers but who were HIV negative themselves, N=63.                                                                                     | Infants had previously received Tetravac (tetanus, acellular pertussis, diphtheria, polio vaccine) and H influenza type B polysaccharide vaccine at 2, 3 and 4 months and recombinant Hepatitis B vaccine at 3 and 4 months.                                                          | PHA, FHA and PT induced IFN $\gamma$ and IL-12p70. Spontaneous IL-10 secretion. Effect on IFN $\gamma$ secretion in presence and absence of anti-IL-10 antibody. IL-10 polymorphisms.                                         | PHA induced IFN $\gamma$ and IL-12p70.<br><br>Spontaneous IL-10 secretion.                                   | Median pg/ml with interquartile range. NB PHA data reported based on spontaneous IL-10 secreting status.<br><br>IL-10 data reported for individual infants. | NS/not fully reported                                                                                                                                                              | All children had been involved in previous studies on cellular immune responses to pertussis vaccine<br><br>All had received 6 weeks of Zidovudine prophylaxis until HIV status was confirmed.<br><br>Part funded by Sanofi Pasteur. |
| Fernandes <i>et al</i> 2010[68] | Cohort study. Blood taken 7 days before, 7 and 28 days after vaccination.                                                                                                                         | Healthy males aged 18-55 years in Canada, N=20.                                                                                                                                               | Single dose of tetanus/diphtheria vaccine.                                                                                                                                                                                                                                            | Frequency of B lymphocyte subsets. IgG, IgA and tetanus/diphtheria specific antibody secretion. IgA and IgG antibody to polio virus and HSV.                                                                                  | Frequency of B lymphocyte subsets.<br><br>IgA and IgG antibody to polio virus and HSV.                       | Mean absolute number or % cells $\pm$ standard error of mean.<br><br>Spots/1000 PPC for 3 subjects, error bars are standard error of mean.                  | NS over 28 days<br><br>Increase in HSV IgG (p<0.01), IgA (p<0.01), and Polio virus IgA (p<0.005) at day 7 compared to day -7.                                                      | Adult only study.<br><br>Funding source not reported.                                                                                                                                                                                |
| Fryauff <i>et al</i> 1998[69]   | Sub study of anti-malarial RCT. Subjects in anti-malarial trial were immunised while controls (not taking part in malaria trial) were not. Blood taken before, 1 and 7 months after immunisation. | Healthy Adult male transmigrate farmers of Javanese/Sundanese ethnicity, who were taking part in a malaria prophylaxis trial, N=72 and control subjects not having malaria prophylaxis, N=20. | Non-control subjects had previously randomised to weekly chloroquine, daily primaquine or placebo for 12 months. These subjects received Tetanus and diphtheria toxoid vaccine 11 months after starting the assigned drug regimen. Control subjects did not receive any intervention. | Lymphocyte proliferation in response to PHA, TT, M. TB PPD and TT subunit peptides (P2, P30 and P2P30)                                                                                                                        | Lymphocyte proliferation in response to PHA and M. TB PPD                                                    | PHA and PPD data not reported.                                                                                                                              | Not reported                                                                                                                                                                       | Adult only study. Sub study of anti-malarial trial.                                                                                                                                                                                  |
| Halasa <i>et al</i> 2008[70]    | Prospective, randomised, pilot study investigating an additional dose of DTP at birth. Safety data collected after every dose and blood samples at birth, 6,7,17 and 18 months.                   | Infants aged 2-14 days, n=50.                                                                                                                                                                 | Group 1: DTaP and hep B at birth<br>Group 2: Hep B only at birth.<br><br>NB Both groups received routine vaccines including DTaP at 2,4,6 and 17 months.                                                                                                                              | Adverse reactions. IgG to PT, PHA PRN and Fimbriae 2/3. PRP Hib capsule antigen. Pneumococcal capsule antigens, diphtheria and tetanus toxoids. Neutralization assays for polio and hep B surface antibodies (7 months only). | Polio neutralisation assays, pneumococcal serotypes 6, 14, 23 and Hep B antibodies at 7 and 18 month visits. | Geometric mean concentrations                                                                                                                               | Higher GMC for pneumococcal serotype 14 in controls at 7 months (p=0.035) and higher microneutralisation titres in controls for poliovirus 1 and 3 at 18 months (p=0.39 and 0.041) | At 7 months, 2 subjects in the experimental group and 1 control had an additional Hib dose as protective antibody titers not achieved.                                                                                               |
| He <i>et al</i>                 | Case-control study                                                                                                                                                                                | Disease cases (total                                                                                                                                                                          | Single dose of combined                                                                                                                                                                                                                                                               | Proliferation in response                                                                                                                                                                                                     | Proliferation in response                                                                                    | Data not shown for                                                                                                                                          |                                                                                                                                                                                    | All adult vaccinated                                                                                                                                                                                                                 |



|                                 |                                                                                                                                                                                                                    |                                                                                                                                                                                                                                                                                                                                                                                                             |                                                                                                                                                                        |                                                                                                                                                                                                                                                                                                                |                                                                                                                                                                           |                                                                                                      |                                                                         |                                                                                                                   |
|---------------------------------|--------------------------------------------------------------------------------------------------------------------------------------------------------------------------------------------------------------------|-------------------------------------------------------------------------------------------------------------------------------------------------------------------------------------------------------------------------------------------------------------------------------------------------------------------------------------------------------------------------------------------------------------|------------------------------------------------------------------------------------------------------------------------------------------------------------------------|----------------------------------------------------------------------------------------------------------------------------------------------------------------------------------------------------------------------------------------------------------------------------------------------------------------|---------------------------------------------------------------------------------------------------------------------------------------------------------------------------|------------------------------------------------------------------------------------------------------|-------------------------------------------------------------------------|-------------------------------------------------------------------------------------------------------------------|
| 1998[71]                        | comparing children and adults either vaccinated against pertussis or with natural pertussis infection and children/adults who did not receive pertussis vaccine. Blood taken before and 1 month after immunisation | N=8): 13 year old children (N=6) and adults (n =2, aged 26 and 60 years) with culture confirmed pertussis infection.<br><br>Vaccinated cases (total N=20): Male and female children in Finland, aged 10-12years, N=17. Adult males, N=3.<br><br>Controls (total N=25) : 10-12year old children who had received DT booster in last month (N=9), Adults (N=8), healthy 13 year-olds (N=6) and newborns (N=2) | diphtheria-tetanus-trivalent acellular pertussis (DTaP) vaccine given to vaccinated cases                                                                              | to pertussis antigen (PT, FHA and PRN), PHA and pokeweed mitogen (latter two not reported).<br><br>Cytokine mRNA expression in PBMCs for IFN $\gamma$ , IL-2, IL-4 and IL-5. IgG antibodies to PT, PHA and PRN.                                                                                                | to PHA and pokeweed mitogen (not reported).<br><br>Cytokine mRNA responses to PHA and unstimulated were not reported                                                      | PHA and PWM.<br><br>Medium only reported for individuals as [H <sup>3</sup> ]thymidine incorporation | NS (p value not given)                                                  | controls and cases came from authors department.                                                                  |
| Heine <i>et al</i> 2011[72]     | Randomized, double-blinded, placebo controlled trial comparing oral vitamin D to placebo. All subjects immunised after 9 weeks of supplementation and blood taken before and 7 days after immunisation.            | Adults aged 26-34.5 years                                                                                                                                                                                                                                                                                                                                                                                   | 2000IU of oral vitamin D3 oil per day or equal volume of neutral oil.<br><br>All subjects received tetanus/diphtheria toxoid vaccine after 9 weeks of supplementation. | 25-hydroxyvitamin D. TT specific IgG and IgA. Peripheral B and T lymphocytes. T cell activation to stimulation by Staph enterotoxin. TT specific cytokine profile (IL-2, IL-4, IL-5, IL-10, TNF- $\alpha$ and IFN $\gamma$ ). Adverse events.<br><br>Leukocyte counts and IgG, IgA and IgM levels (supp. data) | T cell activation to stimulation by Staph enterotoxin and no antigen. Pre vaccination data not reported.<br><br>Leukocyte counts and IgG, IgA and IgM levels (supp. data) | Medians in pg/ml with interquartile range<br><br>concentrations                                      | Not reported<br><br>Monocyte count decreased in placebo group (p=0.04). | Randomized intervention is Vitamin D supplementation therefore no unimmunised controls.                           |
| Jorgensen <i>et al</i> 2013[73] | Sub-study within a larger randomised double blind controlled trial                                                                                                                                                 | Infants six weeks of age (n=480), either prior or after DTP vaccination                                                                                                                                                                                                                                                                                                                                     | Randomised to Vitamin A supplementation or placebo                                                                                                                     | Cytokine production. Leukocyte counts.                                                                                                                                                                                                                                                                         | TNF- $\alpha$ , IL-10, IL-5, IL-13 and IFN- $\gamma$ responses in culture<br><br>Lymphocytes, granulocytes, Eosinophils and monocytes                                     | Geometric mean (pg/ml)<br><br>Mean and SD                                                            | NS<br><br>NS                                                            |                                                                                                                   |
| Lin <i>et al</i> 1997[74]       | Randomized, controlled trial with three groups, including control. 15/80 subjects bled before and 1 month after vaccination.                                                                                       | Healthy medical personnel in Taiwan, aged 20-40 years, N=80.                                                                                                                                                                                                                                                                                                                                                | Single dose of:<br>Group 1: Td + full strength acellular pertussis vaccine<br>Group 2: Td+half strength acellular pertussis vaccine<br>Group 3: Td alone as            | Adverse reactions. Anti-PT and anti-FHA antibodies. Lymphocyte proliferation to PT, FHA, Con-A, PHA and PWM. Cytokine production (IFN $\gamma$ , IL-4, IL-5) to Con-A, PT and                                                                                                                                  | Lymphocyte proliferation to Con-A, PHA and PWM. Cytokine production (IFN $\gamma$ , IL-4, IL-5) to Con-A.                                                                 | Stimulation index CPM, mean $\pm$ standard error.<br><br>pg/ml, mean $\pm$ standard error.           | NS                                                                      | Adult only study.<br><br>Designed to examine different pertussis vaccines but all received Td including controls. |

|                               |                                                                                                                                                                        |                                                                                                                                              |                                                                                                                                                                                                 |                                                                                                                                                                                                                                                                                                                                             |                                                                                                                                                                                                                                                                                                                                             |                                                                                                                                                                                     |                                                                                                                                                                                                                                                                                                                                                                                                                                                                                         |                                                                                                                                            |
|-------------------------------|------------------------------------------------------------------------------------------------------------------------------------------------------------------------|----------------------------------------------------------------------------------------------------------------------------------------------|-------------------------------------------------------------------------------------------------------------------------------------------------------------------------------------------------|---------------------------------------------------------------------------------------------------------------------------------------------------------------------------------------------------------------------------------------------------------------------------------------------------------------------------------------------|---------------------------------------------------------------------------------------------------------------------------------------------------------------------------------------------------------------------------------------------------------------------------------------------------------------------------------------------|-------------------------------------------------------------------------------------------------------------------------------------------------------------------------------------|-----------------------------------------------------------------------------------------------------------------------------------------------------------------------------------------------------------------------------------------------------------------------------------------------------------------------------------------------------------------------------------------------------------------------------------------------------------------------------------------|--------------------------------------------------------------------------------------------------------------------------------------------|
|                               |                                                                                                                                                                        |                                                                                                                                              | control                                                                                                                                                                                         | FHA.                                                                                                                                                                                                                                                                                                                                        |                                                                                                                                                                                                                                                                                                                                             |                                                                                                                                                                                     |                                                                                                                                                                                                                                                                                                                                                                                                                                                                                         |                                                                                                                                            |
| Rowe <i>et al</i> 2000[75]    | Cohort study, all vaccinated, blood samples at 2, 3, 6 and 12 months.                                                                                                  | Healthy infants in Australia, n=55                                                                                                           | DTaP at 2, 4 and 6 months. Infants also received oral polio and Hib titre vaccines.                                                                                                             | IL-4, IL-5, IL-6, IL-9, IL-10, IL13 and IFN $\gamma$ stimulated by TT and PHA.<br>IL-4 and IL-9 mRNA.                                                                                                                                                                                                                                       | IL-4, IL-5, IL-6, IL-9, IL-10, IL13 and IFN $\gamma$ stimulated by PHA.                                                                                                                                                                                                                                                                     | Median pg/ml (test minus control cultures) with 10 <sup>th</sup> , 25 <sup>th</sup> , 75 <sup>th</sup> and 90 <sup>th</sup> percentiles. for positive responders                    | Increase in IL-5 (p=0.01) and IL-13 (p=0.01) at 12 compared to 6 months. Increase in IL-5 (p=0.05) at 6 compared to 4 months.                                                                                                                                                                                                                                                                                                                                                           |                                                                                                                                            |
| Yousfi <i>et al</i> 2005[76]  | Case-control study comparing responses of elderly and young adults to mild inflammatory stress (i.e. vaccine). Blood taken 7 days before and 2 days after vaccination. | Cases: Elderly, male and female volunteers (mean age 70 $\pm$ 4), N=7.<br>Controls: Young, male and female volunteers (mean age 23 $\pm$ 2). | Single dose DT-Polio and Typhim Vi vaccine.                                                                                                                                                     | Acute phase proteins (CRP, AGP, Fibrinogen, $\alpha$ 1-Antitrypsin, Haptoglobin, Albumin, Transthyretin, Transferrin).<br><br>White blood cells counts.<br><br>Plasma cytokine levels (TNF $\alpha$ , IL-6, IL-10). IL-6 and IL-10 production by LPS stimulated whole blood.<br><br>IFN- $\gamma$ production by PHA stimulated whole blood. | Acute phase proteins (CRP, AGP, Fibrinogen, $\alpha$ 1-Antitrypsin, Haptoglobin, Albumin, Transthyretin, Transferrin).<br><br>White blood cells counts.<br><br>Plasma cytokine levels (TNF $\alpha$ , IL-6, IL-10). IL-6 and IL-10 production by LPS stimulated whole blood.<br><br>IFN- $\gamma$ production by PHA stimulated whole blood. | Acute phase protein in mg or g/L, means $\pm$ standard error of mean.<br><br>Cells/L, means $\pm$ standard error<br><br>Cytokine levels ng/L or pg/ml, individual values with mean. | Increase from pre to post vaccine for CRP (p=0.003), AGP (p=0.0007), fibrinogen (p=0.004), haptoglobin (p=0.0023) and Transthyretin (p=0.01). Increase from pre to post vaccine in monocytes (p=0.007), lymphocytes (p=0.002) and neutrophils (p=0.04) Elderly group plasma IL-6 and IL-10 increases from baseline (p<0.05). Both groups had increased IFN- $\gamma$ production to PHA from baseline (p<0.05). Young adults had increased IL-6 production to LPS from baseline (p<0.05) | Adult only study. Designed to compare elderly with young adults.<br><br>Vaccine used included Typhoid.<br><br>Funding source not reported. |
| Zorzeto <i>et al</i> 2009[77] | Prospective, randomized, double-blinded, phase I comparative trial. Blood sample taken at 7 months of age (1 month after last vaccine).                                | Infants in Brazil, male and female, aged 2.1( $\pm$ 0.5 and 0.3)months N=247                                                                 | Immunisation at 2, 4 and 6 months with either conventional whole cell pertussis vaccine or pertussis vaccine with low LPS content. Both vaccines also contained Diphtheria and tetanus toxoids. | T cell, CD3+ CD4+, CD8+ and $\gamma\delta$ + cell proliferation when stimulated by pertussis and PHA. Adverse events. IFN $\gamma$ , TNF- $\alpha$ and IL-10 concentrations in response to pertussis and PHA. Anti-PT IgG titres. % protected against Diphtheria and tetanus.                                                               | T cell, CD3+ CD4+, CD8+ and $\gamma\delta$ + cell proliferation stimulated by PHA.<br><br>IFN $\gamma$ , TNF- $\alpha$ and IL-10 concentrations in response to PHA.                                                                                                                                                                         | Median % of specific T cells with 95% CI.<br><br>Medians of CD3+ blasts with individual points also plotted.<br><br>Median pg/ml with individual points also plotted.               | NS                                                                                                                                                                                                                                                                                                                                                                                                                                                                                      |                                                                                                                                            |

**Table F. Characteristics of the included pertussis vaccine study**

| Author                           | Methods                                                                                                                                                                                | Participants                                                                                          | Interventions                                                                                                                                           | All Outcomes                                                                                                                         | Non-specific outcomes             | Method of reporting non-specific outcomes                                                                                   | Difference in NSE outcome | Notes                                                                  |
|----------------------------------|----------------------------------------------------------------------------------------------------------------------------------------------------------------------------------------|-------------------------------------------------------------------------------------------------------|---------------------------------------------------------------------------------------------------------------------------------------------------------|--------------------------------------------------------------------------------------------------------------------------------------|-----------------------------------|-----------------------------------------------------------------------------------------------------------------------------|---------------------------|------------------------------------------------------------------------|
| Di Tommaso <i>et al</i> 1997[78] | Follow-on of two phase 1 trials. Subjects bled either 6, 12, 18 and 24 months (monocomponent vaccine group) or 1, 2.5, 12, 18 and 54 months (tricomponent group) after second vaccine. | Healthy adults, male and female, 25-38 years, who previously participated in one of two studies, N=8. | Subjects had previously received two doses, six weeks apart, of either a monocomponent pertussis vaccine (N=4) or tricomponent pertussis vaccine (N=4). | PT neutralizing antibodies. IgG antibodies to PT, FHA and 69K antigens. Proliferation of PBMC in response to PT and TT, FHA and 69K. | PBMC proliferation response to TT | Stimulation index for each participant at each time point for those who had previously received monocomponent vaccine only. | Significance not reported | Authored by IRIS, the Chiron-Vaccines Immunobiology research Institute |

**Table G. Risk of bias assessment of included BCG studies**

| Author                                |                              | Random sequence generation (selection bias)                                                                                              | Allocation concealment (selection bias)                                                                                                           | Blinding (performance bias and detection bias) All outcomes                                    | Incomplete outcome data (attrition bias) All outcomes                          | Selective reporting (reporting bias)                                                                                                                                             | Other bias                                                                                                                                                                                                      |
|---------------------------------------|------------------------------|------------------------------------------------------------------------------------------------------------------------------------------|---------------------------------------------------------------------------------------------------------------------------------------------------|------------------------------------------------------------------------------------------------|--------------------------------------------------------------------------------|----------------------------------------------------------------------------------------------------------------------------------------------------------------------------------|-----------------------------------------------------------------------------------------------------------------------------------------------------------------------------------------------------------------|
| Akkoc <i>et al</i> 2010               | <b>Authors judgement</b>     | Low risk                                                                                                                                 | Unclear risk                                                                                                                                      | Unclear risk                                                                                   | Unclear risk                                                                   | Unclear risk                                                                                                                                                                     |                                                                                                                                                                                                                 |
|                                       | <b>Support for judgement</b> | Full term healthy newborns from a single centre                                                                                          | No information on randomisation methods                                                                                                           | Open trial                                                                                     | No information on management of missing data                                   | No information on adjusting for multiple analyses                                                                                                                                |                                                                                                                                                                                                                 |
| Anderson <i>et al</i> 2013            | <b>Authors judgement</b>     | High risk                                                                                                                                | High risk                                                                                                                                         | Unclear risk                                                                                   | Unclear risk                                                                   | Unclear risk                                                                                                                                                                     | Unclear risk                                                                                                                                                                                                    |
|                                       | <b>Support for judgement</b> | Subgroup of a larger trial with proportions of children taking part in subgroup trial varying by month on inclusion in the larger trial. | Randomized but no details given. Even with randomization, BCG group had significantly less hospitalisation and more often received micronutrients | Not blinded                                                                                    | Different children sampled at different timepoints                             | Multiple subgroup analyses                                                                                                                                                       | Part of the REVAC trial. During the study there was a national campaign to supplement with vitamin A and give missing vaccinations. Iron was also distributed to a subgroup in connection with a malaria trial. |
| Black <i>et al</i> 2001               | <b>Authors judgement</b>     | Low risk                                                                                                                                 | Unclear risk                                                                                                                                      | Unclear risk                                                                                   | Unclear risk                                                                   | High risk                                                                                                                                                                        | Unclear risk                                                                                                                                                                                                    |
|                                       | <b>Support for judgement</b> | Database was screened for eligible individuals                                                                                           | No details of randomisation method                                                                                                                | No details of blinding process. Assume that participants were at least blinded to intervention | 84% follow-up rate at 1 year, however variable numbers reported for each assay | Different numbers of subjects reported for each assay without explanation                                                                                                        | Overall limited amount of information.                                                                                                                                                                          |
| Black <i>et al</i> 2002               | <b>Authors judgement</b>     | Low risk                                                                                                                                 | Low risk                                                                                                                                          | Low risk                                                                                       | Low risk                                                                       | Unclear risk                                                                                                                                                                     |                                                                                                                                                                                                                 |
|                                       | <b>Support for judgement</b> | Database was screened for eligible individuals in Malawi. In the UK recruitment was via a school vaccination program.                    | Randomised in blocks of six                                                                                                                       | Staff and subjects blinded to intervention                                                     | Probably a complete set of data                                                | Those subjects who had positive skin tests were recruited in to the control groups                                                                                               |                                                                                                                                                                                                                 |
| Burl <i>et al</i> 2010                | <b>Authors judgement</b>     | Low risk                                                                                                                                 | Low risk                                                                                                                                          | Unclear risk                                                                                   | Low risk                                                                       | Low risk                                                                                                                                                                         |                                                                                                                                                                                                                 |
|                                       | <b>Support for judgement</b> | Full term healthy newborns recruited at delivery from a single hospital.                                                                 | Randomised in blocks of 20                                                                                                                        | Open trial                                                                                     | 87 out of 103 completed 9 month time-point                                     | Corrected for multiple analyses                                                                                                                                                  |                                                                                                                                                                                                                 |
| Burl <i>et al</i> (Aug) 2010          | <b>Authors judgement</b>     | Low risk                                                                                                                                 | Low risk                                                                                                                                          | Unclear risk                                                                                   | Low risk                                                                       | Unclear risk                                                                                                                                                                     |                                                                                                                                                                                                                 |
|                                       | <b>Support for judgement</b> | Full term healthy newborns recruited at delivery from a single hospital.                                                                 | Randomised in blocks of 20                                                                                                                        | Open trial                                                                                     | 85/103 were followed-up at the final 20-28 month time-point                    | Statistical corrections made for multiple analyses<br><br>Possibly more subjects excluded in group 2 due to tuberculosis exposure. i.e at 4.5 months Grp 1 n=51/53 Grp 2 n=39/50 |                                                                                                                                                                                                                 |
| Burl <i>et al</i> 2009                | <b>Authors judgement</b>     | Low risk                                                                                                                                 | Low risk                                                                                                                                          | Unclear risk                                                                                   | Low risk                                                                       | Low risk                                                                                                                                                                         |                                                                                                                                                                                                                 |
|                                       | <b>Support for judgement</b> | Full term healthy newborns recruited at delivery from a single hospital.                                                                 | Randomised in blocks of 20                                                                                                                        | Open trial                                                                                     | 87 out of 103 completed 9 month time-point                                     | Corrected for multiple analyses                                                                                                                                                  |                                                                                                                                                                                                                 |
| Djuardi <i>et al</i> 2010             | <b>Authors judgement</b>     | High risk                                                                                                                                | High risk                                                                                                                                         | Unclear risk                                                                                   | Unclear risk                                                                   | Unclear                                                                                                                                                                          |                                                                                                                                                                                                                 |
|                                       | <b>Support for judgement</b> | Non-random. Part of a cohort to examine immune responses to helminths in children                                                        | Non-random                                                                                                                                        | Open trial                                                                                     | 98 out of 147 children were followed up at the 2 year time-point               | No information                                                                                                                                                                   |                                                                                                                                                                                                                 |
| Elliot <i>et al</i> 2011 (BCG and TT) | <b>Authors judgement</b>     | High risk                                                                                                                                | High risk                                                                                                                                         | Unclear risk                                                                                   | High risk                                                                      | Low risk                                                                                                                                                                         | High risk                                                                                                                                                                                                       |
|                                       | <b>Support for judgement</b> | Random sequence generation was for mother's treatment. Infants were not randomized to                                                    | Non-random                                                                                                                                        | Open trial                                                                                     | 1506 out of 2345 completed the BCG arm<br>1433 out of 2345 completed           | Missing data described.                                                                                                                                                          | Mothers received various numbers of vaccinations during                                                                                                                                                         |

|                                  |                              |                                                                                                                     |                                                                                                                 |                                                      |                                                                                                                                                                                               |                                                                                              |                                                                                                   |
|----------------------------------|------------------------------|---------------------------------------------------------------------------------------------------------------------|-----------------------------------------------------------------------------------------------------------------|------------------------------------------------------|-----------------------------------------------------------------------------------------------------------------------------------------------------------------------------------------------|----------------------------------------------------------------------------------------------|---------------------------------------------------------------------------------------------------|
|                                  |                              | any intervention                                                                                                    |                                                                                                                 |                                                      | the TT arm                                                                                                                                                                                    |                                                                                              | pregnancy. There is no data on whether this may affect the infants subsequent response to vaccine |
| Faustman <i>et al</i> 2012       | <b>Authors judgement</b>     | Low risk                                                                                                            | Low risk                                                                                                        | Low risk                                             | Low risk                                                                                                                                                                                      | Unclear risk                                                                                 |                                                                                                   |
|                                  | <b>Support for judgement</b> | Concealed allocation                                                                                                | Randomisation scheme prepared by the hospital pharmacy                                                          | Staff and subjects blinded to intervention           | All subjects accounted for                                                                                                                                                                    | A placebo treated subject developed primary EBV and was reported exclusively                 |                                                                                                   |
| Fjallbrant <i>et al</i> 2007     | <b>Authors judgement</b>     | Unclear risk                                                                                                        | High risk                                                                                                       | High risk                                            | Low risk                                                                                                                                                                                      | Unclear risk                                                                                 |                                                                                                   |
|                                  | <b>Support for judgement</b> | Subjects selected from 123 TST negative healthcare students based on matching previously vaccinated and not groups. | Non-random                                                                                                      | Non-blinded                                          | No apparent attrition.                                                                                                                                                                        | Non-specific data not reported                                                               |                                                                                                   |
| Gruber <i>et al</i> 2000         | <b>Authors judgement</b>     | Unclear risk                                                                                                        | High risk                                                                                                       | Unclear risk                                         | High risk                                                                                                                                                                                     | Low risk                                                                                     |                                                                                                   |
|                                  | <b>Support for judgement</b> | Prospective cohort but 38% selective as high risk for atopic disease by family history                              | Vaccinated children had received BCG as they were at increased risk of TB and were more likely to be non-German | Unclear if blinded.                                  | 774/1314 included in this analysis as completed all scheduled examinations. Significant difference noted between these children and cohort as a whole in breastfeeding and vaccination rates. | Addresses aims, corrects for multiple analyses.                                              |                                                                                                   |
| Hoft <i>et al</i> 1998           | <b>Authors judgement</b>     | Unclear risk                                                                                                        | Low risk                                                                                                        | Low risk                                             | Unclear risk                                                                                                                                                                                  | Unclear risk                                                                                 |                                                                                                   |
|                                  | <b>Support for judgement</b> | No information on recruitment                                                                                       | No information on randomisation method                                                                          | Double blinded                                       | 53/54 participants completed the study. Some missing data not accounted for                                                                                                                   | Sub classified subjects in to responders and non-responders                                  |                                                                                                   |
| Hoft <i>et al</i> 1999           | <b>Authors judgement</b>     | Unclear risk                                                                                                        | Unclear risk                                                                                                    | Unclear risk                                         | Unclear risk                                                                                                                                                                                  | Unclear risk                                                                                 |                                                                                                   |
|                                  | <b>Support for judgement</b> | No information on recruitment                                                                                       | No information on randomisation method                                                                          | One arm was open label. Three arms were double blind | 65/66 participants completed the study. Some missing data not accounted for                                                                                                                   | Most of the ELISA data is not reported.                                                      |                                                                                                   |
| Hussey <i>et al</i> 2002         | <b>Authors judgement</b>     | High risk                                                                                                           | High risk                                                                                                       | Unclear risk                                         | Unclear risk                                                                                                                                                                                  | Unclear risk                                                                                 |                                                                                                   |
|                                  | <b>Support for judgement</b> | Doesn't state specifically how subjects were identified                                                             | Non-random                                                                                                      | Open trial                                           | Data missing for some assays.                                                                                                                                                                 | Didn't correct for multiple analyses.                                                        |                                                                                                   |
| Kagina <i>et al</i> 2009)        | <b>Authors judgement</b>     | Low risk                                                                                                            | Low risk                                                                                                        | Unclear risk                                         | Low risk                                                                                                                                                                                      | Unclear risk                                                                                 |                                                                                                   |
|                                  | <b>Support for judgement</b> | Approached mothers at antenatal clinic                                                                              | Randomly allocated                                                                                              | Open trial                                           | Relatively acceptable exclusions at each time-point documented                                                                                                                                | No information on a priori analysis                                                          |                                                                                                   |
| Kleinnijenhuis <i>et al</i> 2012 | <b>Authors judgement</b>     | High risk                                                                                                           | High risk                                                                                                       | Unclear risk                                         | Low risk                                                                                                                                                                                      | Low risk                                                                                     |                                                                                                   |
|                                  | <b>Support for judgement</b> | Non-random                                                                                                          | Non-random                                                                                                      | Open trial                                           | Small group size with no apparent attrition                                                                                                                                                   | No information on adjustment for multiple analyses                                           | Small group size and no information on group subject composition                                  |
| Lalor <i>et al</i> 2009          | <b>Authors judgement</b>     | High risk                                                                                                           | High risk                                                                                                       | Unclear risk                                         | Unclear risk                                                                                                                                                                                  | Unclear risk                                                                                 | High risk                                                                                         |
|                                  | <b>Support for judgement</b> | Recruitment in the UK through health centres. In Malawi recruitment took place at a single hospital                 | Non-random                                                                                                      | Open-trial                                           | No information on missing data                                                                                                                                                                | Sub-set of Malawi cohort who were vaccinated at the same time as the UK cohort were compared | Different age of vaccination in UK compared to Malawi                                             |
| Lalor <i>et al</i> 2010          | <b>Authors judgement</b>     | High risk                                                                                                           | Unclear risk                                                                                                    | Unclear risk                                         | Low risk                                                                                                                                                                                      | Unclear risk                                                                                 | Unclear risk                                                                                      |
|                                  | <b>Support for judgement</b> | Subgroups of a larger study                                                                                         | Non-random                                                                                                      | Not blinded                                          | Single time-point and all results appear present                                                                                                                                              | Unstimulated control data not reported                                                       | Infants had previously taken part in an IFN gamma study                                           |
| Lalor <i>et al</i> 2011          | <b>Authors judgement</b>     | High risk                                                                                                           | High risk                                                                                                       | Unclear risk                                         | Unclear risk                                                                                                                                                                                  | Low risk                                                                                     | High risk                                                                                         |
|                                  | <b>Support for judgement</b> | Subgroup of a larger study                                                                                          | Non-random                                                                                                      | Open-trial                                           | No information on missing                                                                                                                                                                     | No information                                                                               | Different age of                                                                                  |

|                             |                              |                                                                                                               |                                                                    |                                                                                 |                                                                                                       |                                                                                                                                                    |                                                                                                 |
|-----------------------------|------------------------------|---------------------------------------------------------------------------------------------------------------|--------------------------------------------------------------------|---------------------------------------------------------------------------------|-------------------------------------------------------------------------------------------------------|----------------------------------------------------------------------------------------------------------------------------------------------------|-------------------------------------------------------------------------------------------------|
|                             |                              | where recruitment was in the UK through health centres. In Malawi recruitment took place at a single hospital |                                                                    |                                                                                 | data                                                                                                  |                                                                                                                                                    | vaccination in UK compared to Malawi                                                            |
| Libraty <i>et al</i> 2014   | <b>Authors judgement</b>     | Unclear risk                                                                                                  | Unclear risk                                                       | Unclear risk                                                                    | Unclear risk                                                                                          | Low risk                                                                                                                                           |                                                                                                 |
|                             | <b>Support for judgement</b> | Selected form a nested study due to specific attributes                                                       | Not random                                                         | Not blinded                                                                     | No information on management of missing data                                                          | All data appear to be reported                                                                                                                     |                                                                                                 |
| Lowry <i>et al</i> 1998     | <b>Authors judgement</b>     | Unclear risk                                                                                                  | Unclear risk                                                       | Unclear risk                                                                    | Unclear risk                                                                                          | High risk                                                                                                                                          | Unclear risk                                                                                    |
|                             | <b>Support for judgement</b> | Doesn't state specifically how subjects were identified                                                       | Randomized but no details given                                    | Unclear if blinded                                                              | Blood from 62/76 subjects was tested for lymphoproliferation but 76/76 for serological studies        | Non specific data not reported                                                                                                                     | 15 subjects were revaccinated at 16 weeks                                                       |
| Marchant <i>et al</i> 1999  | <b>Authors judgement</b>     | Low risk                                                                                                      | Low risk                                                           | Unclear risk                                                                    | High risk                                                                                             | Unclear risk                                                                                                                                       |                                                                                                 |
|                             | <b>Support for judgement</b> | Healthy newborns from a single centre                                                                         | Randomised in blocks of 6                                          | Open trial                                                                      | 48 out of 137 were studied at the 1 year time-point                                                   | Adjusted for multiple analyses, but no information on a priori analysis and ITT analysis                                                           |                                                                                                 |
| Marks <i>et al</i> 2003     | <b>Authors judgement</b>     | High risk                                                                                                     | High risk                                                          | High risk                                                                       | Unclear risk                                                                                          | Low risk                                                                                                                                           |                                                                                                 |
|                             | <b>Support for judgement</b> | Mothers of potential participants identified by hospital records                                              | Non-random                                                         | Retrospective open trial. No information regarding masking of laboratory staff. | Attempted to gather information from those who didn't respond to the survey.                          | A small proportion of the cytokine data was not included in analysis due to low responses in controls. Corrected for a wide variety of confounders |                                                                                                 |
| Miles <i>et al</i> 2008     | <b>Authors judgement</b>     | High risk                                                                                                     | Unclear risk                                                       | Unclear risk                                                                    | High risk                                                                                             | High risk                                                                                                                                          | High risk                                                                                       |
|                             | <b>Support for judgement</b> | All samples from infants recruited into a larger CMV study                                                    | Non-random                                                         | Not blinded                                                                     | 133 infants had blood taken at some point but largest number of samples at any one time-point was 87. | NHDF results not reported                                                                                                                          | All infants were infected with CMV                                                              |
| Miles <i>et al</i> 2010     | <b>Authors judgement</b>     | High risk                                                                                                     | High risk                                                          | Unclear risk                                                                    | Unclear risk                                                                                          | Unclear risk                                                                                                                                       | High risk                                                                                       |
|                             | <b>Support for judgement</b> | Non-random                                                                                                    | Non-random, no unvaccinated controls                               | Open trial                                                                      | No information on management of missing data                                                          | Infants that were diagnosed with HIV were excluded. ELISpot data classified into high and low responders                                           | HIV positive mothers and children born to them all received anti-retroviral therapy             |
| Ota <i>et al</i> 2002       | <b>Authors judgement</b>     | Low risk                                                                                                      | Low risk                                                           | Unclear risk                                                                    | Unclear risk                                                                                          | Unclear risk                                                                                                                                       |                                                                                                 |
|                             | <b>Support for judgement</b> | Healthy newborns from a single centre                                                                         | Randomised in blocks of 6                                          | Open trial                                                                      | 85 out of 151 were followed-up at 4.5 month time-point                                                | Selective data for responses to HBV reported                                                                                                       |                                                                                                 |
| Smith <i>et al</i> 2012     | <b>Authors judgement</b>     | High risk                                                                                                     | Unclear risk                                                       | Unclear risk                                                                    | Low risk                                                                                              | Low risk                                                                                                                                           |                                                                                                 |
|                             | <b>Support for judgement</b> | Doesn't state specifically how subjects were identified                                                       | Non-random                                                         | Open trial                                                                      | Missing data accounted for.                                                                           | Adjusted for multiple comparisons                                                                                                                  |                                                                                                 |
| Soares <i>et al</i> 2013    | <b>Authors judgement</b>     | Low risk                                                                                                      | Unclear risk                                                       | Unclear risk                                                                    | Unclear risk                                                                                          | Low risk                                                                                                                                           |                                                                                                 |
|                             | <b>Support for judgement</b> | Recruitment antenatally, of mothers attending maternity units                                                 | Not random                                                         | Not blinded                                                                     | 11/90 lost to follow-up and 6/90 exclusions                                                           | Data appear to be complete                                                                                                                         |                                                                                                 |
| Steenhuis <i>et al</i> 2008 | <b>Authors judgement</b>     | High risk                                                                                                     | Unclear risk                                                       | Low risk                                                                        | Low risk                                                                                              | Unclear risk                                                                                                                                       | High risk                                                                                       |
|                             | <b>Support for judgement</b> | Newborns were recruited antenatal from parents with allergic disease                                          | Randomly allocated although no information on randomisation method | Parents not blinded but principle researcher was.                               | 115/121 completed the study                                                                           | Only 58 tested for eosinophils at 18 months                                                                                                        | Unable to recruit required 200 participants therefore explorative analysis only.<br><br>19 were |

|                                     |                              |                                                                                                                                                                         |                                                                           |                                            |                                                                    |                                                                                    |                                                                                                     |
|-------------------------------------|------------------------------|-------------------------------------------------------------------------------------------------------------------------------------------------------------------------|---------------------------------------------------------------------------|--------------------------------------------|--------------------------------------------------------------------|------------------------------------------------------------------------------------|-----------------------------------------------------------------------------------------------------|
|                                     |                              |                                                                                                                                                                         |                                                                           |                                            |                                                                    |                                                                                    | revaccinated at 4 months.                                                                           |
| Tastan <i>et al</i> 2005            | <b>Authors judgement</b>     | Unclear risk                                                                                                                                                            | Unclear risk                                                              | Unclear risk                               | Low risk                                                           | Low risk                                                                           | Unclear risk                                                                                        |
|                                     | <b>Support for judgement</b> | Neonates were randomly chosen but not further details of selection process                                                                                              | Randomised but no details given                                           | Not blinded                                | 36/40 completed study                                              | All results appear present                                                         | Funding source not reported                                                                         |
| van den Biggelaar <i>et al</i> 2009 | <b>Authors judgement</b>     | Unclear risk                                                                                                                                                            | Unclear risk                                                              | Unclear risk                               | Unclear risk                                                       | Unclear risk                                                                       |                                                                                                     |
|                                     | <b>Support for judgement</b> | Very few details on participant selection. Significant differences at baseline between PNG and Australian newborn cohorts for caesarean delivery and head circumference | Not random                                                                | Not blinded                                | Some participants missing in outcome reporting with no explanation | Outcomes not clearly defined                                                       |                                                                                                     |
| Vargas <i>et al</i> 2004            | <b>Authors judgement</b>     | Low risk                                                                                                                                                                | Unclear risk                                                              | Unclear risk                               | Low risk                                                           | Low risk                                                                           |                                                                                                     |
|                                     | <b>Support for judgement</b> | Children recruited from several schools and diagnosis confirmed with pre-specified criteria.                                                                            | Unclear if properly randomised (alternate allocation to group)            | Unclear if blinded                         | 67/82 completed study. Reasons for withdrawal given.               | All results appear present                                                         |                                                                                                     |
| Vekemans <i>et al</i> 2004          | <b>Authors judgement</b>     | Unclear risk                                                                                                                                                            | Low risk                                                                  | Unclear risk                               | Unclear risk                                                       | Unclear risk                                                                       |                                                                                                     |
|                                     | <b>Support for judgement</b> | No information on selection procedure                                                                                                                                   | Randomly allocated although no information on randomisation method        | Open trial                                 | No information on management of missing data                       | No information                                                                     |                                                                                                     |
| Vijaya Lakshmi V, <i>et al</i> 2005 | <b>Authors judgement</b>     | High risk                                                                                                                                                               | High risk                                                                 | High risk                                  | Unclear risk                                                       | Unclear risk                                                                       | High risk                                                                                           |
|                                     | <b>Support for judgement</b> | Non-random                                                                                                                                                              | Non-random. Subjects possibly selected based on prior vaccination history | Open trial (retrospective)                 | No information on management of missing data                       | Subjects classified into responders and non-responders                             | Selection bias due to prior vaccine receipt                                                         |
| Weir <i>et al</i> 2004              | <b>Authors judgement</b>     | Low risk                                                                                                                                                                | Low risk                                                                  | Low risk                                   | Low risk                                                           | Unclear risk                                                                       |                                                                                                     |
|                                     | <b>Support for judgement</b> | Database was screened for eligible individuals in Malawi. In the UK recruitment was via a school vaccination program.                                                   | Randomised in blocks of six                                               | Staff and subjects blinded to intervention | Probably a complete set of data                                    | Those subjects who had positive skin tests were recruited in to the control groups |                                                                                                     |
| Weir <i>et al</i> 2008              | <b>Authors judgement</b>     | Low risk                                                                                                                                                                | High risk                                                                 | Unclear risk                               | Unclear risk                                                       | Unclear risk                                                                       | High risk                                                                                           |
|                                     | <b>Support for judgement</b> | Recruitment was via a school vaccination program                                                                                                                        | Allocation dependent on response to skin testing                          | Open trial                                 | No information on missing data                                     | No information on adjustment for multiple analyses                                 | Bias towards subjects with a Heaf grade of 2 or above being included into the control group.        |
| Weir <i>et al</i> 2008              | <b>Authors judgement</b>     | Low risk                                                                                                                                                                | Low risk                                                                  | Unclear risk                               | Unclear risk                                                       | Unclear risk                                                                       | Unclear risk                                                                                        |
|                                     | <b>Support for judgement</b> | School vaccination programs                                                                                                                                             | Random allocation                                                         | Open label                                 | Only subjects with data at each time-point were included           | Not all antigens and controls reported for all cohorts                             | Study reports responses at different time-point by following up cohorts from three separate studies |

**Table H. Risk of bias assessment of included measles studies**

| Author                      |                              | Random sequence generation (selection bias)                                                                                                                                            | Allocation concealment (selection bias)                                                                         | Blinding (performance bias and detection bias) All outcomes          | Incomplete outcome data (attrition bias) All outcomes                                                                                           | Selective reporting (reporting bias)                                                                            | Other bias                                                                                                                           |
|-----------------------------|------------------------------|----------------------------------------------------------------------------------------------------------------------------------------------------------------------------------------|-----------------------------------------------------------------------------------------------------------------|----------------------------------------------------------------------|-------------------------------------------------------------------------------------------------------------------------------------------------|-----------------------------------------------------------------------------------------------------------------|--------------------------------------------------------------------------------------------------------------------------------------|
| Bertley <i>et al</i> 2004   | <b>Authors judgement</b>     | Unclear risk                                                                                                                                                                           | Unclear risk                                                                                                    | Unclear risk                                                         | High risk                                                                                                                                       | High risk                                                                                                       |                                                                                                                                      |
|                             | <b>Support for judgement</b> | Subjects were followed up from 6/14 of the original communities, chosen at random.                                                                                                     | Details of previous randomisation not reported.                                                                 | Not blinded                                                          | Only 37.8% of the original children were followed up at 5 years.                                                                                | Results from the group who previously received single high dose EZ vaccine are not reported                     |                                                                                                                                      |
| Gans <i>et al</i> 1999      | <b>Authors judgement</b>     | Unclear risk                                                                                                                                                                           | Unclear risk                                                                                                    | Unclear risk                                                         | Unclear risk                                                                                                                                    | Unclear risk                                                                                                    | High risk                                                                                                                            |
|                             | <b>Support for judgement</b> | Minimal details about subjects (ethnicity etc) and recruitment methods                                                                                                                 | Not randomized, adult control not matched                                                                       | Not blinded                                                          | Post vaccine samples available for 134/162 infants but not all tested for all assays.                                                           | Non-specific effects not fully reported.                                                                        | Unclear if previously vaccinated adults are used as controls. If so they are not suitable given age, unclear vaccination status etc. |
| Gans <i>et al</i> 2004      | <b>Authors judgement</b>     | Unclear risk                                                                                                                                                                           | Unclear risk                                                                                                    | Unclear risk                                                         | Unclear risk                                                                                                                                    | High risk                                                                                                       |                                                                                                                                      |
|                             | <b>Support for judgement</b> | Minimal details about subjects (ethnicity etc).                                                                                                                                        | Not randomized. Insufficient information to compare cases and controls.                                         | Not blinded                                                          | Not all sample sizes allowed for full immunological evaluation but N is given for each assay.                                                   | PHA stimulated results not reported                                                                             |                                                                                                                                      |
| Hennino <i>et al</i> 2007   | <b>Authors judgement</b>     | Low risk                                                                                                                                                                               | Low risk                                                                                                        | Low risk                                                             | High risk                                                                                                                                       | Unclear risk                                                                                                    | High risk                                                                                                                            |
|                             | <b>Support for judgement</b> | All children had atopic dermatitis (AD) based on criteria of Hanifin and Rajka                                                                                                         | Randomization file generated by computer                                                                        | Double-blinded                                                       | 5-6 infants out of 12 were tested for CCL18/E-selectin due to lack of serum and only 6 were followed up for 6 months for severity of AD scoring | Only 2 placebo subjects had CCL18 and E-selectin levels reported compared to 4 and 3 measles vaccine recipients | One infant seroconverted after placebo                                                                                               |
| Hussey <i>et al</i> 1996    | <b>Authors judgement</b>     | High risk                                                                                                                                                                              | High risk                                                                                                       | Unclear risk                                                         | Unclear risk                                                                                                                                    | Unclear risk                                                                                                    | High risk                                                                                                                            |
|                             | <b>Support for judgement</b> | Children recruited from two clinics in high and low measles prevalence areas but all children from low risk area received same vaccine and were all 9 months. No details of ethnicity. | Not randomized. Allocated based on order of attendance. Children from low prevalence area all had same vaccine. | Not blinded                                                          | 13/88 lost to follow up (2 of which excluded due to serological evidence of measles before vaccination)                                         | Not always obvious from figures how many children have provided results.                                        | All children aged 9 months were from a low prevalence area. Comparisons are made between groups which may not be comparable.         |
| Jaye <i>et al</i> 2014      | <b>Authors judgement</b>     | High risk                                                                                                                                                                              | Unclear risk                                                                                                    | Unclear risk                                                         | High risk                                                                                                                                       | Unclear risk                                                                                                    |                                                                                                                                      |
|                             | <b>Support for judgement</b> | Very few demographic details                                                                                                                                                           | Not random                                                                                                      | Not blinded                                                          | Initial number of recruits not stated                                                                                                           | Not enough information                                                                                          |                                                                                                                                      |
| Liguori <i>et al</i> 1998   | <b>Authors judgement</b>     | Unclear risk                                                                                                                                                                           | Unclear risk                                                                                                    | Unclear risk                                                         | High risk                                                                                                                                       | Low risk                                                                                                        | High risk                                                                                                                            |
|                             | <b>Support for judgement</b> | Insufficient details about recruitment and participants including previous vaccination history.                                                                                        | Not randomized                                                                                                  | Not randomized                                                       | 5/20 lost to follow-up- no details given                                                                                                        | Individual results reported for each subject                                                                    | Funding source not reported                                                                                                          |
| Lisse <i>et al</i> 1994     | <b>Authors judgement</b>     | Unclear risk                                                                                                                                                                           | Unclear risk                                                                                                    | Unclear risk                                                         | High risk                                                                                                                                       | Low risk                                                                                                        |                                                                                                                                      |
|                             | <b>Support for judgement</b> | Only those taking part in previous study were eligible. Only 330/854 from original study took part. Data for those not taking part not available except for those who died.            | Not randomised                                                                                                  | Not clear if those analysing samples were blinded to original group. | 330/854 from original studies took part.                                                                                                        | All results appear present.                                                                                     | Mortality data from this group is presented in Aaby 1993                                                                             |
| Njie-Jobe <i>et al</i> 2012 | <b>Authors judgement</b>     | Unclear risk                                                                                                                                                                           | Unclear risk                                                                                                    | Unclear risk                                                         | Unclear risk                                                                                                                                    | Unclear risk                                                                                                    | Unclear risk                                                                                                                         |
|                             | <b>Support for judgement</b> | Subjects were recruited from a                                                                                                                                                         | Randomised but details                                                                                          | Not blinded                                                          | 91/132 completed study.                                                                                                                         | PHA results not reported.                                                                                       | Despite randomisation,                                                                                                               |



|                                |                              |                                                                                             |                                                                                                                                                           |                            |                                                                                                                                                                                                        |                                                                                                     |                                                                                                                                                                                                                                                                                               |
|--------------------------------|------------------------------|---------------------------------------------------------------------------------------------|-----------------------------------------------------------------------------------------------------------------------------------------------------------|----------------------------|--------------------------------------------------------------------------------------------------------------------------------------------------------------------------------------------------------|-----------------------------------------------------------------------------------------------------|-----------------------------------------------------------------------------------------------------------------------------------------------------------------------------------------------------------------------------------------------------------------------------------------------|
|                                |                              | larger CMV observational study.                                                             | not given                                                                                                                                                 |                            | Similar attrition rates across groups                                                                                                                                                                  |                                                                                                     | groups had significantly different median measles antibody titres at baseline                                                                                                                                                                                                                 |
| Okada <i>et al</i> 2001        | <b>Authors judgement</b>     | Unclear risk                                                                                | Unclear risk                                                                                                                                              | Unclear risk               | Unclear risk                                                                                                                                                                                           | High risk                                                                                           | High risk                                                                                                                                                                                                                                                                                     |
|                                | <b>Support for judgement</b> | Insufficient demographic details (E.g ethnicity and socioeconomic status) to compare groups | Insufficient detail regarding vaccination of controls (eg when vaccinated and how many with each strain)                                                  | Not blinded                | Each point on the figure represents average of 3-15 patients but unclear if numbers consistent                                                                                                         | Control bloods were reportedly taken from 40 age-matched healthy children but no results are given. | NB for purposes of this SR, only the results for the vaccinated cohort have been included                                                                                                                                                                                                     |
| Ovsyannikova <i>et al</i> 2003 | <b>Authors judgement</b>     | Low risk                                                                                    | Unclear                                                                                                                                                   | Unclear risk               | High risk                                                                                                                                                                                              | High risk                                                                                           | High risk                                                                                                                                                                                                                                                                                     |
|                                | <b>Support for judgement</b> | Subjects were randomly assigned to timing of blood draw                                     | Not randomized, no control                                                                                                                                | Not blinded                | Each subject had single blood draw therefore results at each time point are different children. Small numbers at each timepoint. Day 0 children (N=2 and 7) did not receive vaccine before blood draw. | As previous                                                                                         | One infant had positive measles antibody titres pre vaccination.                                                                                                                                                                                                                              |
| Pabst <i>et al</i> 1999        | <b>Authors judgement</b>     | Low risk                                                                                    | Unclear risk                                                                                                                                              | Unclear risk               | Unclear risk                                                                                                                                                                                           | Low risk                                                                                            | High risk                                                                                                                                                                                                                                                                                     |
|                                | <b>Support for judgement</b> | 300 subjects enrolled over a 20 month period                                                | Subjects in group 2 were apparently randomized to one of two vaccines but all those in group 1 received same vaccine, therefore not all groups comparable | Not clear if blinded       | Samples not available for 2/300 at baseline and for 3/300 at 8 weeks. Not all assays performed on every sample- numbers given in paper.                                                                | All results appear present                                                                          | Measles vaccine was given immediately after the third dose of DTP-Polio-Hib therefore any non-specific effects cannot be attributed to measles vaccine alone.<br><br>Group 1 mothers were assumed to have had measles but this was not confirmed (e.g. through testing mothers for antibody). |
| Samb <i>et al</i> 1995         | <b>Authors judgement</b>     | Unclear risk                                                                                | Unclear risk                                                                                                                                              | Unclear risk               | Unclear risk                                                                                                                                                                                           | Unclear risk                                                                                        |                                                                                                                                                                                                                                                                                               |
|                                | <b>Support for judgement</b> | Very few details on participant demographics                                                | Randomly selected but no details of methods                                                                                                               | Not blinded                | Very few details on participants that were not included or missing data                                                                                                                                | all results appear present, however no evidence of an a priori analysis                             |                                                                                                                                                                                                                                                                                               |
| Schnorr <i>et al</i> 2001      | <b>Authors judgement</b>     | Unclear risk                                                                                | High risk                                                                                                                                                 | Unclear risk               | Unclear risk                                                                                                                                                                                           | High risk                                                                                           |                                                                                                                                                                                                                                                                                               |
|                                | <b>Support for judgement</b> | Recruited from larger measles trial                                                         | Not randomised. Controls more likely to have acute malnutrition and significantly less likely to have had 3 doses of DTP.                                 | No information on blinding | Higher loss to follow up in control group                                                                                                                                                              | Non-significant data not shown                                                                      |                                                                                                                                                                                                                                                                                               |

**Table I. Risk of bias assessment of included MMR vaccine studies**

|                                |                              |                                                                                                                               |                            |              |                                                                                                                |                                    |                                                                          |
|--------------------------------|------------------------------|-------------------------------------------------------------------------------------------------------------------------------|----------------------------|--------------|----------------------------------------------------------------------------------------------------------------|------------------------------------|--------------------------------------------------------------------------|
| Nakayama <i>et al</i> 1990     | <b>Authors judgement</b>     | Unclear risk                                                                                                                  | Unclear risk               | Unclear risk | Low risk                                                                                                       | High risk                          | Unclear risk                                                             |
|                                | <b>Support for judgement</b> | Minimal details about subjects (ethnicity, mean age etc.)                                                                     | Not randomized             | Not blinded  | Paired sera obtained for all subjects (NB only 11 took part in IFN subset)                                     | Non-specific effects not reported. | Only 11/229 children had blood taken for IFN assays.                     |
| Pabst <i>et al</i> 1997        | <b>Authors judgement</b>     | Unclear risk                                                                                                                  | Unclear risk               | Unclear risk | Unclear risk                                                                                                   | Low risk                           |                                                                          |
|                                | <b>Support for judgement</b> | Minimal details about subjects (ethnicity, mean age etc.)                                                                     | Not randomized             | Not blinded  | Not all children assay at each time point. Not clear if all children provided two samples.                     | All results appear present         |                                                                          |
| Rager-Zisman <i>et al</i> 2003 | <b>Authors judgement</b>     | Unclear risk                                                                                                                  | Unclear risk               | Unclear risk | Unclear risk                                                                                                   | Unclear risk                       | High risk                                                                |
|                                | <b>Support for judgement</b> | Healthy Israeli children but limited information about subjects (ethnicity etc) and 13 had received 2 doses of MMR previously | Not randomized, no control | Not blinded  | Number of children tested varies by assay (N=28-38). Due is some cases to lack of serum but details not given. | As previous.                       | 13 children had received two doses of MMR previously due to an epidemic. |

**Table J. Risk of bias assessment of included tetanus toxoid vaccine studies**

| Author                                 |                              | Random sequence generation (selection bias) | Allocation concealment (selection bias)                                               | Blinding (performance bias and detection bias) All outcomes | Incomplete outcome data (attrition bias) All outcomes                         | Selective reporting (reporting bias)                               | Other bias                                                           |
|----------------------------------------|------------------------------|---------------------------------------------|---------------------------------------------------------------------------------------|-------------------------------------------------------------|-------------------------------------------------------------------------------|--------------------------------------------------------------------|----------------------------------------------------------------------|
| Armitage <i>et al</i> 1993             | <b>Authors judgement</b>     | High risk                                   | High risk                                                                             | High risk                                                   | Unclear risk                                                                  | Unclear risk                                                       |                                                                      |
|                                        | <b>Support for judgement</b> | Non-random                                  | Non-random, different number of vaccination doses received depending on prior history | Open trial, staff participating in trial                    | No information                                                                | No information                                                     |                                                                      |
| Borut <i>et al</i> 1980                | <b>Authors judgement</b>     | High risk                                   | High risk                                                                             | High risk                                                   | Unclear risk                                                                  | Unclear risk                                                       |                                                                      |
|                                        | <b>Support for judgement</b> | Non-random                                  | Non-random. Differing age ranges. Vaccination status determined on history            | Open trial, staff participating in trial                    | No information                                                                | No information                                                     |                                                                      |
| Chollet <i>et al</i> 1979              | <b>Authors judgement</b>     | High risk                                   | High risk                                                                             | Unclear risk                                                | Unclear risk                                                                  | Unclear risk                                                       | High risk                                                            |
|                                        | <b>Support for judgement</b> | Non-random                                  | Non-random                                                                            | Open trial                                                  | No information                                                                | No information                                                     | General lack of information on subject demographics and study design |
| Chui <i>et al</i> 2004                 | <b>Authors judgement</b>     | High risk                                   | High risk                                                                             | Unclear risk                                                | Unclear risk                                                                  | Unclear risk                                                       | High risk                                                            |
|                                        | <b>Support for judgement</b> | Non-random                                  | Non-random                                                                            | Open trial                                                  | Missing information for 2 participants                                        | No information                                                     | Small cohort sizes                                                   |
| Cooper <i>et al</i> 1998               | <b>Authors judgement</b>     | High risk                                   | High risk                                                                             | Unclear risk                                                | Unclear risk                                                                  | Unclear risk                                                       |                                                                      |
|                                        | <b>Support for judgement</b> | Non-random                                  | Non-random. Groups defined on presence of <i>Onchocera volvulus</i> infection         | Open trial                                                  | No information                                                                | No information                                                     |                                                                      |
| Di Genova <i>et al</i> 2006 (Also BCG) | <b>Authors judgement</b>     | High risk                                   | High risk                                                                             | Unclear risk                                                | Unclear risk                                                                  | High risk                                                          |                                                                      |
|                                        | <b>Support for judgement</b> | Non-random                                  | Non-random, cohort                                                                    | Open trial                                                  | No information                                                                | Results selectively reported for maximal response time-point       |                                                                      |
| Fernandez <i>et al</i> 1994            | <b>Authors judgement</b>     | High risk                                   | High risk                                                                             | Unclear risk                                                | Unclear risk                                                                  | Unclear risk                                                       | High risk                                                            |
|                                        | <b>Support for judgement</b> | Non-random                                  | Non-random                                                                            | Open trial                                                  | No information, although missing data unlikely given only 3 subjects in study | No information                                                     | Only 3 subjects                                                      |
| Fevrier <i>et al</i> 1977              | <b>Authors judgement</b>     | High risk                                   | High risk                                                                             | Unclear risk                                                | Unclear risk                                                                  | High risk                                                          | High risk                                                            |
|                                        | <b>Support for judgement</b> | Non-random                                  | Non-random, cohort with very little demographic details reported                      | Open trial                                                  | No information                                                                | Selective reporting/conduction of experiments in specific subjects | Small cohort with experiments performed on selected individuals      |
| Gentile <i>et al</i> 2006              | <b>Authors judgement</b>     | High risk                                   | High risk                                                                             | Unclear risk                                                | Low risk                                                                      | Unclear risk                                                       | Unclear risk                                                         |
|                                        | <b>Support for judgement</b> | Non-random                                  | Non-random                                                                            | Open trial                                                  | All subjects completed the trial                                              | Allergy skin testing not reported. Primary outcome defined         | Exclusion of those who were on treatment for allergic rhinitis       |
| Livingston <i>et al</i> 2013           | <b>Authors judgement</b>     | High risk                                   | High risk                                                                             | Unclear risk                                                | Low risk                                                                      | Unclear risk                                                       |                                                                      |
|                                        | <b>Support for judgement</b> | Non-random                                  | Non-random                                                                            | Open trial                                                  | All participants completed all visits                                         | No information                                                     |                                                                      |
| Mahalingham <i>et al</i> 2010          | <b>Authors judgement</b>     | Unclear risk                                | Unclear risk                                                                          | Unclear risk                                                | Unclear risk                                                                  | Unclear risk                                                       |                                                                      |
|                                        | <b>Support for judgement</b> | Only females selected                       | No information on randomisation procedure                                             | Double blinded to receipt of palm oil                       | No information                                                                | No information                                                     |                                                                      |

**Supplementary Table 20. Risk of bias assessment of included DTP and DT vaccine studies**

| Author                      |                              | Random sequence generation (selection bias)                                                                                                                                                  | Allocation concealment (selection bias)                                                | Blinding (performance bias and detection bias) All outcomes           | Incomplete outcome data (attrition bias) All outcomes                                                            | Selective reporting (reporting bias)                                                                                   | Other bias                                                                                                                                                                                                                            |
|-----------------------------|------------------------------|----------------------------------------------------------------------------------------------------------------------------------------------------------------------------------------------|----------------------------------------------------------------------------------------|-----------------------------------------------------------------------|------------------------------------------------------------------------------------------------------------------|------------------------------------------------------------------------------------------------------------------------|---------------------------------------------------------------------------------------------------------------------------------------------------------------------------------------------------------------------------------------|
| Dirix <i>et al</i> 2009     | <b>Authors judgement</b>     | High risk                                                                                                                                                                                    | Unclear risk                                                                           | Unclear risk                                                          | Unclear risk                                                                                                     | Unclear risk                                                                                                           | Unclear risk                                                                                                                                                                                                                          |
|                             | <b>Support for judgement</b> | Subjects were selected by having HIV positive mothers but being HIV negative. All had received Zidovudine for 6 weeks until HIV status confirmed. All had been included in previous studies. | Not randomised                                                                         | Not blinded                                                           | Not all infants were bled at all time points and not all assays could be performed due to limited blood volumes. | Some assays only report results from 11 subjects.                                                                      | All children had been involved in previous studies on cellular immune responses to pertussis vaccine.<br><br>All had received 6 weeks of Zidovudine prophylaxis until HIV status was confirmed.<br><br>Part funded by Sanofi Pasteur. |
| Fernandes <i>et al</i> 2010 | <b>Authors judgement</b>     | Unclear risk                                                                                                                                                                                 | Unclear risk                                                                           | Unclear risk                                                          | Low risk                                                                                                         | Unclear risk                                                                                                           | Unclear risk                                                                                                                                                                                                                          |
|                             | <b>Support for judgement</b> | Male only subjects.                                                                                                                                                                          | Not randomised, no unvaccinated controls.                                              | Not blinded                                                           | All completed protocol                                                                                           | Frequency of B lymphocyte subjects is from one representative subject.                                                 | Funding source not reported.                                                                                                                                                                                                          |
| Fryauff <i>et al</i> 1998   | <b>Authors judgement</b>     | High risk                                                                                                                                                                                    | High risk                                                                              | Unclear risk                                                          | Unclear risk                                                                                                     | Unclear risk                                                                                                           | High risk                                                                                                                                                                                                                             |
|                             | <b>Support for judgement</b> | Subjects were recruited from a pre-existing malaria prophylaxis trial. All male.                                                                                                             | Not randomised, controls differed as not receiving anti-malarials.                     | Not blinded                                                           | Attrition rate not reported. Some assays not done (table 1)                                                      | PHA and PPD data not shown.                                                                                            | Subset of other (anti-malarial) trial. Unclear if control group was part of this trial or not.                                                                                                                                        |
| Halasa <i>et al</i> 2008    | <b>Authors judgement</b>     | Low risk                                                                                                                                                                                     | Unclear risk                                                                           | Unclear risk                                                          | Low risk                                                                                                         | Low risk                                                                                                               | Unclear risk                                                                                                                                                                                                                          |
|                             | <b>Support for judgement</b> | 270 parents approached to get sample size of 50.                                                                                                                                             | Randomised but no details given.                                                       | Parents blinded, but unclear if study staff were.                     | 42/50 completed study, reasons for withdrawal given.                                                             | All results appear present                                                                                             | Part funded by Sanofi-Pasteur                                                                                                                                                                                                         |
| He <i>et al</i> 1998        | <b>Authors judgement</b>     | Unclear risk                                                                                                                                                                                 | Unclear risk                                                                           | Unclear risk                                                          | Unclear risk                                                                                                     | High risk                                                                                                              | High risk                                                                                                                                                                                                                             |
|                             | <b>Support for judgement</b> | Children randomly selected. Adult vaccinees and controls were convenience sample from department.                                                                                            | Not randomised. Natural infection cases had been symptomatic for a wide range of time. | Not blinded                                                           | PHA and pokeweed responses not shown.                                                                            | Results reported for certain patients only which varies by assay                                                       | Controls not well matched for group as a whole.                                                                                                                                                                                       |
| Heine <i>et al</i> 2011     | <b>Authors judgement</b>     | High risk                                                                                                                                                                                    | Unclear risk                                                                           | Low risk                                                              | Unclear risk                                                                                                     | High risk                                                                                                              | High risk                                                                                                                                                                                                                             |
|                             | <b>Support for judgement</b> | Recruitment from department of Dermatology and Allergy but no details of any medical conditions reported.                                                                                    | Random assignment to Vit D treatment group but no details of process given             | Double-blinded (NB blinded intervention is Vitamin D supplementation) | Attrition rates not reported                                                                                     | Subjects with evidence of spontaneous cytokine release were excluded due to assumed subclinical concomitant infection. | Randomized intervention is Vitamin D supplementation therefore no unimmunised controls.                                                                                                                                               |
| Jorgensen <i>et al</i> 2013 | <b>Authors judgement</b>     | Unclear risk                                                                                                                                                                                 | Low risk                                                                               | Low risk                                                              | Unclear risk                                                                                                     | Unclear risk                                                                                                           | Unclear risk                                                                                                                                                                                                                          |
|                             | <b>Support for judgement</b> | Subjects recruited across six districts. No differences in demographics. Rules for inclusion modified mid-study                                                                              | Randomised using a code held by the pharmacist.                                        | Double blinded                                                        | No information on how many/or if all of those recruited into the main study were approached for this sub-study   | Recruitment protocol modified significantly with respect to DTP outcome reported                                       | DTP vaccinated cohort much smaller than unvaccinated cohort                                                                                                                                                                           |
| Lin <i>et al</i> 1997       | <b>Authors judgement</b>     | Unclear risk                                                                                                                                                                                 | Unclear risk                                                                           | Unclear risk                                                          | High risk                                                                                                        | Unclear risk                                                                                                           |                                                                                                                                                                                                                                       |
|                             | <b>Support for judgement</b> | All medical personnel from one Children's hospital in Taiwan.                                                                                                                                | No details of randomisation process given                                              | Unclear if blinded                                                    | Only 15/80 were bled before and after vaccination. However all 80 provide adverse reaction data.                 | Unclear how many subjects are included in each table.                                                                  |                                                                                                                                                                                                                                       |
| Rowe <i>et al</i> 2000      | <b>Authors judgement</b>     | Unclear risk                                                                                                                                                                                 | Unclear risk                                                                           | Unclear risk                                                          | Low risk                                                                                                         | High risk                                                                                                              | Unclear risk                                                                                                                                                                                                                          |

|                           |                              |                                |                                                                                    |                |                                                                                                                              |                                                   |                             |
|---------------------------|------------------------------|--------------------------------|------------------------------------------------------------------------------------|----------------|------------------------------------------------------------------------------------------------------------------------------|---------------------------------------------------|-----------------------------|
|                           | <b>Support for judgement</b> | Recruitment details not given  | Not randomized                                                                     | Not blinded    | Samples were obtained from $\geq 78\%$ of the group at each time point                                                       | Results are reported for positive responders only | Funding source not reported |
| Yousfi <i>et al</i> 2005  | <b>Authors judgement</b>     | Unclear risk                   | Unclear risk                                                                       | Unclear risk   | Unclear risk                                                                                                                 | Low risk                                          | Unclear risk                |
|                           | <b>Support for judgement</b> | Recruitment details not given. | Not randomised, no unvaccinated controls                                           | Not blinded    | Attrition rates not reported however some subjects appear missing.                                                           | All results appear to be reported.                | Funding source not reported |
| Zorzeto <i>et al</i> 2009 | <b>Authors judgement</b>     | Low risk                       | Unclear risk                                                                       | Low risk       | Unclear risk                                                                                                                 | High risk                                         |                             |
|                           | <b>Support for judgement</b> |                                | Randomized to receive one of two vaccines but no details of randomization process. | Double-blinded | 234/237 completed the study. Results reported for varying number of subjects depending on assay (reported in figures/tables) | Figure 1 reports one infant only                  |                             |

**Table K. Risk of bias assessment of the included pertussis vaccine study.**

| Author                       |                              | Random sequence generation<br>(selection bias)                                                                                        | Allocation concealment<br>(selection bias) | Blinding (performance<br>bias and detection bias)<br>All outcomes | Incomplete outcome data<br>(attrition bias)<br>All outcomes | Selective reporting<br>(reporting bias)                 | Other bias                                 |
|------------------------------|------------------------------|---------------------------------------------------------------------------------------------------------------------------------------|--------------------------------------------|-------------------------------------------------------------------|-------------------------------------------------------------|---------------------------------------------------------|--------------------------------------------|
| Di Tommaso <i>et al</i> 1997 | <b>Authors judgement</b>     | Unclear risk                                                                                                                          | Unclear risk                               | Unclear risk                                                      | Low risk                                                    | Low risk                                                | Unclear risk                               |
|                              | <b>Support for judgement</b> | Subjects recruited from those taking part in previous trials, unclear how many subjects there were in total in these previous trials. | Not randomised                             | Not blinded                                                       | All data appears to have been reported for each subject     | All data appears to have been reported for each subject | All authors from company producing vaccine |

## Reference list of all included studies

1. Akkoc T, Aydogan M, Yildiz A, et al. Neonatal BCG vaccination induces IL-10 production by CD4+ CD25+ T cells. *Pediatric allergy and immunology : official publication of the European Society of Pediatric Allergy and Immunology* 2010;**21**(7):1059-63 doi: 10.1111/j.1399-3038.2010.01051.x[published Online First: Epub Date].
2. Andersen A, Roth A, Jensen KJ, et al. The immunological effect of revaccination with Bacille Calmette-Guerin vaccine at 19 months of age. *Vaccine* 2013;**31**(17):2137-44 doi: 10.1016/j.vaccine.2013.02.050[published Online First: Epub Date].
3. Black GF, Dockrell HM, Crampin AC, et al. Patterns and implications of naturally acquired immune responses to environmental and tuberculous mycobacterial antigens in northern Malawi. *The Journal of infectious diseases* 2001;**184**(3):322-9 doi: 10.1086/322042[published Online First: Epub Date].
4. Black GF, Weir RE, Floyd S, et al. BCG-induced increase in interferon-gamma response to mycobacterial antigens and efficacy of BCG vaccination in Malawi and the UK: two randomised controlled studies. *Lancet* 2002;**359**(9315):1393-401 doi: 10.1016/S0140-6736(02)08353-8[published Online First: Epub Date].
5. Burl S, Adetifa UJ, Cox M, et al. Delaying bacillus Calmette-Guerin vaccination from birth to 4 1/2 months of age reduces postvaccination Th1 and IL-17 responses but leads to comparable mycobacterial responses at 9 months of age. *Journal of immunology* 2010;**185**(4):2620-8 doi: 10.4049/jimmunol.1000552[published Online First: Epub Date].
6. Burl S, Adetifa UJ, Cox M, et al. The tuberculin skin test (TST) is affected by recent BCG vaccination but not by exposure to non-tuberculosis mycobacteria (NTM) during early life. *PloS one* 2010;**5**(8):e12287 doi: 10.1371/journal.pone.0012287[published Online First: Epub Date].
7. Burl S. The Role of Regulatory T cells in Early Life Immunity to BCG: Influence of Exposure to Environmental Mycobacteria. Open University, 2009.
8. Djuardi Y, Sartono E, Wibowo H, et al. A longitudinal study of BCG vaccination in early childhood: the development of innate and adaptive immune responses. *PloS one* 2010;**5**(11):e14066 doi: 10.1371/journal.pone.0014066[published Online First: Epub Date].
9. Elliott AM, Mawa PA, Webb EL, et al. Effects of maternal and infant co-infections, and of maternal immunisation, on the infant response to BCG and tetanus immunisation. *Vaccine* 2010;**29**(2):247-55 doi: 10.1016/j.vaccine.2010.10.047[published Online First: Epub Date].
10. Faustman DL, Wang L, Okubo Y, et al. Proof-of-concept, randomized, controlled clinical trial of Bacillus-Calmette-Guerin for treatment of long-term type 1 diabetes. *PloS one* 2012;**7**(8):e41756 doi: 10.1371/journal.pone.0041756[published Online First: Epub Date].
11. Fjallbrant H, Ridell M, Larsson LO. Primary vaccination and revaccination of young adults with BCG: a study using immunological markers. *Scandinavian journal of infectious diseases* 2007;**39**(9):792-8 doi: 10.1080/00365540701367777[published Online First: Epub Date].
12. Gruber C, Kulig M, Bergmann R, et al. Delayed hypersensitivity to tuberculin, total immunoglobulin E, specific sensitization, and atopic manifestation in longitudinally followed early Bacille Calmette-Guerin-vaccinated and nonvaccinated children. *Pediatrics* 2001;**107**(3):E36
13. Hoft DF, Brown RM, Roodman ST. Bacille Calmette-Guerin vaccination enhances human gamma delta T cell responsiveness to mycobacteria suggestive of a memory-like phenotype. *Journal of immunology* 1998;**161**(2):1045-54
14. Hoft DF, Kemp EB, Marinaro M, et al. A double-blind, placebo-controlled study of Mycobacterium-specific human immune responses induced by intradermal bacille Calmette-Guerin vaccination. *The Journal of laboratory and clinical medicine* 1999;**134**(3):244-52
15. Hussey GD, Watkins ML, Goddard EA, et al. Neonatal mycobacterial specific cytotoxic T-lymphocyte and cytokine profiles in response to distinct BCG vaccination strategies. *Immunology* 2002;**105**(3):314-24
16. Kagina BM, Abel B, Bowmaker M, et al. Delaying BCG vaccination from birth to 10 weeks of age may result in an enhanced memory CD4 T cell response. *Vaccine* 2009;**27**(40):5488-95 doi: 10.1016/j.vaccine.2009.06.103[published Online First: Epub Date].
17. Kleinnijenhuis J, Quintin J, Preijers F, et al. Bacille Calmette-Guerin induces NOD2-dependent nonspecific protection from reinfection via epigenetic reprogramming of monocytes. *Proceedings of the National Academy of Sciences of the United States of America* 2012;**109**(43):17537-42 doi: 10.1073/pnas.1202870109[published Online First: Epub Date].
18. Lalor MK, Ben-Smith A, Gorak-Stolinska P, et al. Population differences in immune responses to Bacille Calmette-Guerin vaccination in infancy. *The Journal of infectious diseases* 2009;**199**(6):795-800
19. Lalor MK, Smith SG, Floyd S, et al. Complex cytokine profiles induced by BCG vaccination in UK infants. *Vaccine* 2010;**28**(6):1635-41 doi: 10.1016/j.vaccine.2009.11.004[published Online First: Epub Date].
20. Lalor MK, Floyd S, Gorak-Stolinska P, et al. BCG vaccination induces different cytokine profiles following infant BCG vaccination in the UK and Malawi. *The Journal of infectious diseases* 2011;**204**(7):1075-85 doi: 10.1093/infdis/jir515[published Online First: Epub Date].

21. Libraty DH, Zhang L, Woda M, et al. Neonatal BCG vaccination is associated with enhanced T-helper 1 immune responses to heterologous infant vaccines *Trials in Vaccinology* 2014;**3**:1-5
22. Lowry PW, Ludwig TS, Adams JA, et al. Cellular immune responses to four doses of percutaneous bacille Calmette-Guerin in healthy adults. *The Journal of infectious diseases* 1998;**178**(1):138-46
23. Marchant A, Goetghebuer T, Ota MO, et al. Newborns develop a Th1-type immune response to *Mycobacterium bovis* bacillus Calmette-Guerin vaccination. *Journal of immunology* 1999;**163**(4):2249-55
24. Marks GB, Ng K, Zhou J, et al. The effect of neonatal BCG vaccination on atopy and asthma at age 7 to 14 years: an historical cohort study in a community with a very low prevalence of tuberculosis infection and a high prevalence of atopic disease. *The Journal of allergy and clinical immunology* 2003;**111**(3):541-9
25. Miles DJ, van der Sande M, Crozier S, et al. Effects of antenatal and postnatal environments on CD4 T-cell responses to *Mycobacterium bovis* BCG in healthy infants in the Gambia. *Clinical and vaccine immunology* : CVI 2008;**15**(6):995-1002 doi: 10.1128/CVI.00037-08[published Online First: Epub Date].
26. Miles DJ, Gadama L, Gumbi A, et al. Human immunodeficiency virus (HIV) infection during pregnancy induces CD4 T-cell differentiation and modulates responses to Bacille Calmette-Guerin (BCG) vaccine in HIV-uninfected infants. *Immunology* 2010;**129**(3):446-54 doi: 10.1111/j.1365-2567.2009.03186.x[published Online First: Epub Date].
27. Ota MO, Vekemans J, Schlegel-Haueter SE, et al. Influence of *Mycobacterium bovis* bacillus Calmette-Guerin on antibody and cytokine responses to human neonatal vaccination. *Journal of immunology* 2002;**168**(2):919-25
28. Smith SG, Lecher S, Blitz R, et al. Broad heparin-binding haemagglutinin-specific cytokine and chemokine response in infants following *Mycobacterium bovis* BCG vaccination. *European journal of immunology* 2012;**42**(9):2511-22 doi: 10.1002/eji.201142297[published Online First: Epub Date].
29. Soares AP, Kwong Chung CK, Choice T, et al. Longitudinal changes in CD4(+) T-cell memory responses induced by BCG vaccination of newborns. *The Journal of infectious diseases* 2013;**207**(7):1084-94 doi: 10.1093/infdis/jis941[published Online First: Epub Date].
30. Steenhuis TJ, van Aalderen WM, Bloksma N, et al. Bacille-Calmette-Guerin vaccination and the development of allergic disease in children: a randomized, prospective, single-blind study. *Clinical and experimental allergy : journal of the British Society for Allergy and Clinical Immunology* 2008;**38**(1):79-85 doi: 10.1111/j.1365-2222.2007.02859.x[published Online First: Epub Date].
31. Tastan Y, Arvas A, Demir G, et al. Influence of Bacillus Calmette-Guerin vaccination at birth and 2 months old age on the peripheral blood T-cell subpopulations [ $\gamma$ / $\delta$  and  $\alpha$ - $\beta$  T cell]. *Pediatric allergy and immunology : official publication of the European Society of Pediatric Allergy and Immunology* 2005;**16**(8):624-9 doi: 10.1111/j.1399-3038.2005.00329.x[published Online First: Epub Date].
32. van den Biggelaar AH, Prescott SL, Roponen M, et al. Neonatal innate cytokine responses to BCG controlling T-cell development vary between populations. *The Journal of allergy and clinical immunology* 2009;**124**(3):544-50, 50 e1-2 doi: 10.1016/j.jaci.2009.03.040[published Online First: Epub Date].
33. Vargas MH, Bernal-Alcantara DA, Vaca MA, et al. Effect of BCG vaccination in asthmatic schoolchildren. *Pediatric allergy and immunology : official publication of the European Society of Pediatric Allergy and Immunology* 2004;**15**(5):415-20 doi: 10.1111/j.1399-3038.2004.00198.x[published Online First: Epub Date].
34. Vekemans J, Ota MO, Sillah J, et al. Immune responses to mycobacterial antigens in the Gambian population: implications for vaccines and immunodiagnostic test design. *Infection and immunity* 2004;**72**(1):381-8
35. Vijaya Lakshmi V, Kumar S, Surekha Rani H, et al. Tuberculin specific T cell responses in BCG vaccinated children. *Indian pediatrics* 2005;**42**(1):36-40
36. Weir RE, Black GF, Dockrell HM, et al. Mycobacterial purified protein derivatives stimulate innate immunity: Malawians show enhanced tumor necrosis factor alpha, interleukin-1beta (IL-1beta), and IL-10 responses compared to those of adolescents in the United Kingdom. *Infection and immunity* 2004;**72**(3):1807-11
37. Weir RE, Fine PE, Floyd S, et al. Comparison of IFN-gamma responses to mycobacterial antigens as markers of response to BCG vaccination. *Tuberculosis* 2008;**88**(1):31-8
38. Weir RE, Gorak-Stolinska P, Floyd S, et al. Persistence of the immune response induced by BCG vaccination. *BMC infectious diseases* 2008;**8**:9 doi: 10.1186/1471-2334-8-9[published Online First: Epub Date].
39. Bertley FM, Ibrahim SA, Libman M, et al. Measles vaccination in the presence of maternal antibodies primes for a balanced humoral and cellular response to revaccination. *Vaccine* 2004;**23**(4):444-9 doi: 10.1016/j.vaccine.2004.06.021[published Online First: Epub Date].
40. Gans HA, Maldonado Y, Yasukawa LL, et al. IL-12, IFN-gamma, and T cell proliferation to measles in immunized infants. *Journal of immunology* 1999;**162**(9):5569-75



41. Gans HA, Yasukawa LL, Alderson A, et al. Humoral and cell-mediated immune responses to an early 2-dose measles vaccination regimen in the United States. *The Journal of infectious diseases* 2004;**190**(1):83-90 doi: 10.1086/421032[published Online First: Epub Date].
42. Hennino A, Cornu C, Rozieres A, et al. Influence of measles vaccination on the progression of atopic dermatitis in infants. *Pediatric allergy and immunology : official publication of the European Society of Pediatric Allergy and Immunology* 2007;**18**(5):385-90 doi: 10.1111/j.1399-3038.2007.00537.x[published Online First: Epub Date].
43. Hussey GD, Goddard EA, Hughes J, et al. The effect of Edmonston-Zagreb and Schwarz measles vaccines on immune response in infants. *The Journal of infectious diseases* 1996;**173**(6):1320-6
44. Jaye A, Magnusen AF, Sadiq AD, et al. Ex vivo analysis of cytotoxic T lymphocytes to measles antigens during infection and after vaccination in Gambian children. *The Journal of clinical investigation* 1998;**102**(11):1969-77 doi: 10.1172/JCI3290[published Online First: Epub Date].
45. Liguori G, Tolone C, D'Avanzo M, et al. Modifications of IFN-alpha, TNF-alpha and IFN-gamma serum levels in children vaccinated against measles. *Annali di igiene : medicina preventiva e di comunita* 1998;**10**(5-6):303-6
46. Lisse IM, Aaby P, Knudsen K, et al. Long term impact of high titer Edmonston-Zagreb measles vaccine on T lymphocyte subsets. *The Pediatric infectious disease journal* 1994;**13**(2):109-12
47. Njie-Jobe J, Nyamweya S, Miles DJ, et al. Immunological impact of an additional early measles vaccine in Gambian children: responses to a boost at 3 years. *Vaccine* 2012;**30**(15):2543-50 doi: 10.1016/j.vaccine.2012.01.083[published Online First: Epub Date].
48. Okada H, Sato TA, Katayama A, et al. Comparative analysis of host responses related to immunosuppression between measles patients and vaccine recipients with live attenuated measles vaccines. *Archives of virology* 2001;**146**(5):859-74
49. Ovsyannikova IG, Reid KC, Jacobson RM, et al. Cytokine production patterns and antibody response to measles vaccine. *Vaccine* 2003;**21**(25-26):3946-53
50. Pabst HF, Spady DW, Carson MM, et al. Cell-mediated and antibody immune responses to AIK-C and Connaught monovalent measles vaccine given to 6 month old infants. *Vaccine* 1999;**17**(15-16):1910-8
51. Samb B, Whittle H, Aaby P, et al. No evidence of long-term immunosuppression after high-titer Edmonston-Zagreb measles vaccination in Senegal. *The Journal of infectious diseases* 1995;**171**(2):506-8
52. Schnorr JJ, Cutts FT, Wheeler JG, et al. Immune modulation after measles vaccination of 6-9 months old Bangladeshi infants. *Vaccine* 2001;**19**(11-12):1503-10
53. Nakayama T, Urano T, Osano M, et al. Evaluation of live trivalent vaccine of measles AIK-C strain, mumps Hoshino strain and rubella Takahashi strain, by virus-specific interferon-gamma production and antibody response. *Microbiology and immunology* 1990;**34**(6):497-508
54. Pabst HF, Spady DW, Carson MM, et al. Kinetics of immunologic responses after primary MMR vaccination. *Vaccine* 1997;**15**(1):10-4
55. Rager-Zisman B, Bazarsky E, Skibin A, et al. The effect of measles-mumps-rubella (MMR) immunization on the immune responses of previously immunized primary school children. *Vaccine* 2003;**21**(19-20):2580-8
56. Armitage KB, Duffy EG, Mincek MA, et al. Transient normalization of lymphocyte blastogenic and specific antibody responses following boosting of healthy elderly subjects with tetanus toxoid. *Journal of gerontology* 1993;**48**(1):M19-25
57. Borut TC, Ank BJ, Gard SE, et al. Tetanus toxoid skin test in children: correlation with in vitro lymphocyte stimulation and monocyte chemotaxis. *The Journal of pediatrics* 1980;**97**(4):567-73
58. Chollet P, Chassagne J, Philippe P, et al. Peripheral lymphocytes changes in the anamnestic response to tetanus toxoid challenge. *Clinical and experimental immunology* 1979;**37**(1):152-61
59. Stephen Chui MTMC, PhD† Paul J. Mosca, MD, PhD† Amy C. Hobeika† Takuya Osada, MD† Laurent Galibert, PhD‡ Dania Caron, MD‡, H. Kim Lysterly MMAM, MD\*. Flt3-ligand as a Vaccine Adjuvant: Results in a Study of Flt3-ligand Plus Tetanus Toxoid Immunization. *The Journal of Applied Research* 2004;**4**(4):536-49
60. Cooper PJ, Espinel I, Paredes W, et al. Impaired tetanus-specific cellular and humoral responses following tetanus vaccination in human onchocerciasis: a possible role for interleukin-10. *The Journal of infectious diseases* 1998;**178**(4):1133-8
61. Di Genova G, Roddick J, McNicholl F, et al. Vaccination of human subjects expands both specific and bystander memory T cells but antibody production remains vaccine specific. *Blood* 2006;**107**(7):2806-13 doi: 10.1182/blood-2005-08-3255[published Online First: Epub Date].
62. Fernandez V, Andersson J, Andersson U, et al. Cytokine synthesis analyzed at the single-cell level before and after revaccination with tetanus toxoid. *European journal of immunology* 1994;**24**(8):1808-15 doi: 10.1002/eji.1830240813[published Online First: Epub Date].
63. Fevrier M, Bona C, Eyquem A, et al. Inhibition of mixed lymphocyte reactions in humans after immunization with tetanus toxoid. *Transplantation* 1977;**23**(3):199-209

64. Gentile D, Trecki J, Patel A, et al. Effect of tetanus immunization on t-helper cytokine production in adults with and without allergic rhinitis. *Allergy and asthma proceedings : the official journal of regional and state allergy societies* 2006;**27**(3):197-201
65. Livingston KA, Jiang X, Stephensen CB. CD4 T-helper cell cytokine phenotypes and antibody response following tetanus toxoid booster immunization. *Journal of immunological methods* 2013;**390**(1-2):18-29 doi: 10.1016/j.jim.2013.01.001[published Online First: Epub Date].
66. Mahalingam D, Radhakrishnan AK, Amom Z, et al. Effects of supplementation with tocotrienol-rich fraction on immune response to tetanus toxoid immunization in normal healthy volunteers. *European journal of clinical nutrition* 2011;**65**(1):63-9 doi: 10.1038/ejcn.2010.184[published Online First: Epub Date].
67. Dirix V, Verscheure V, Goetghebuer T, et al. Monocyte-derived interleukin-10 depresses the Bordetella pertussis-specific gamma interferon response in vaccinated infants. *Clinical and vaccine immunology : CVI* 2009;**16**(12):1816-21 doi: 10.1128/CVI.00314-09[published Online First: Epub Date].
68. Fernandes JR, Wasserman S, Snider DP. Stimulation of anti-polio and anti-HSV IgA pre-plasma cell response in blood following parenteral immunization with tetanus-diphtheria vaccine. *Vaccine* 2010;**28**(6):1493-8 doi: 10.1016/j.vaccine.2009.11.057[published Online First: Epub Date].
69. Fryauff DJ, Mouzin E, Church LW, et al. Lymphocyte response to tetanus toxin T-cell epitopes: effects of tetanus vaccination and concurrent malaria prophylaxis. *Vaccine* 1999;**17**(1):59-63
70. Halasa NB, O'Shea A, Shi JR, et al. Poor immune responses to a birth dose of diphtheria, tetanus, and acellular pertussis vaccine. *The Journal of pediatrics* 2008;**153**(3):327-32 doi: 10.1016/j.jpeds.2008.03.011[published Online First: Epub Date].
71. He Q, Tran Minh NN, Edelman K, et al. Cytokine mRNA expression and proliferative responses induced by pertussis toxin, filamentous hemagglutinin, and pertactin of Bordetella pertussis in the peripheral blood mononuclear cells of infected and immunized schoolchildren and adults. *Infection and immunity* 1998;**66**(8):3796-801
72. Heine G, Drozdenko G, Lahl A, et al. Efficient tetanus toxoid immunization on vitamin D supplementation. *European journal of clinical nutrition* 2011;**65**(3):329-34 doi: 10.1038/ejcn.2010.276[published Online First: Epub Date].
73. Jorgensen MJ, Fisker AB, Sartono E, et al. The effect of at-birth vitamin A supplementation on differential leucocyte counts and in vitro cytokine production: an immunological study nested within a randomised trial in Guinea-Bissau. *The British journal of nutrition* 2012:1-11 doi: 10.1017/S0007114512001304[published Online First: Epub Date].
74. Lin TY, Chiang BL. Specific immune response in adult medical personnel immunized with acellular pertussis vaccine with special emphasis on T helper cell response. *Vaccine* 1997;**15**(17-18):1917-21
75. Rowe J, Macaubas C, Monger TM, et al. Antigen-specific responses to diphtheria-tetanus-acellular pertussis vaccine in human infants are initially Th2 polarized. *Infection and immunity* 2000;**68**(7):3873-7
76. El Yousfi M, Mercier S, Breuille D, et al. The inflammatory response to vaccination is altered in the elderly. *Mechanisms of ageing and development* 2005;**126**(8):874-81 doi: 10.1016/j.mad.2005.03.008[published Online First: Epub Date].
77. Zorzeto TQ, Higashi HG, da Silva MT, et al. Immunogenicity of a whole-cell pertussis vaccine with low lipopolysaccharide content in infants. *Clinical and vaccine immunology : CVI* 2009;**16**(4):544-50 doi: 10.1128/CVI.00339-08[published Online First: Epub Date].
78. Di Tommaso A, Bartalini M, Peppoloni S, et al. Acellular pertussis vaccines containing genetically detoxified pertussis toxin induce long-lasting humoral and cellular responses in adults. *Vaccine* 1997;**15**(11):1218-24
